# Supplementary material for: Environmental stress is the major cause of transcriptomic and proteomic changes in GM and non-GM plants
Source: PubMed Central journal article supplement (PMC5587699; doi:10.1038/s41598-017-09646-8), 2017-09-06
Supplement: 41598_2017_9646_MOESM1_ESM.pdf [file 41598_2017_9646_MOESM1_ESM.pdf]

**Title:** Environmental stress is the major cause of transcriptomic and proteomic changes in GM and non-GM plants

**Author names:** Rita Batista, Cátia Fonseca, Sébastien Planchon, Sónia Negrão, Jenny Renaut, M. Margarida Oliveira

## **Legends for Supporting information**

**Figure S1-** Representative 2D- multiplex fluorescence gel with the 271 differentially-abundant spots and 2D gel sections showing examples of different spot patterns between tested samples.

**Table S1-** Proteomic results.

**Table S2-** Microarrays results.

**Table S3-** Proteomics and Microarrays relation (salinity assay).

**Figure S1-** Representative 2D- multiplex fluorescence gel with the 271 differentially-abundant spots and 2D gel sections showing examples of different spot patterns between tested samples.

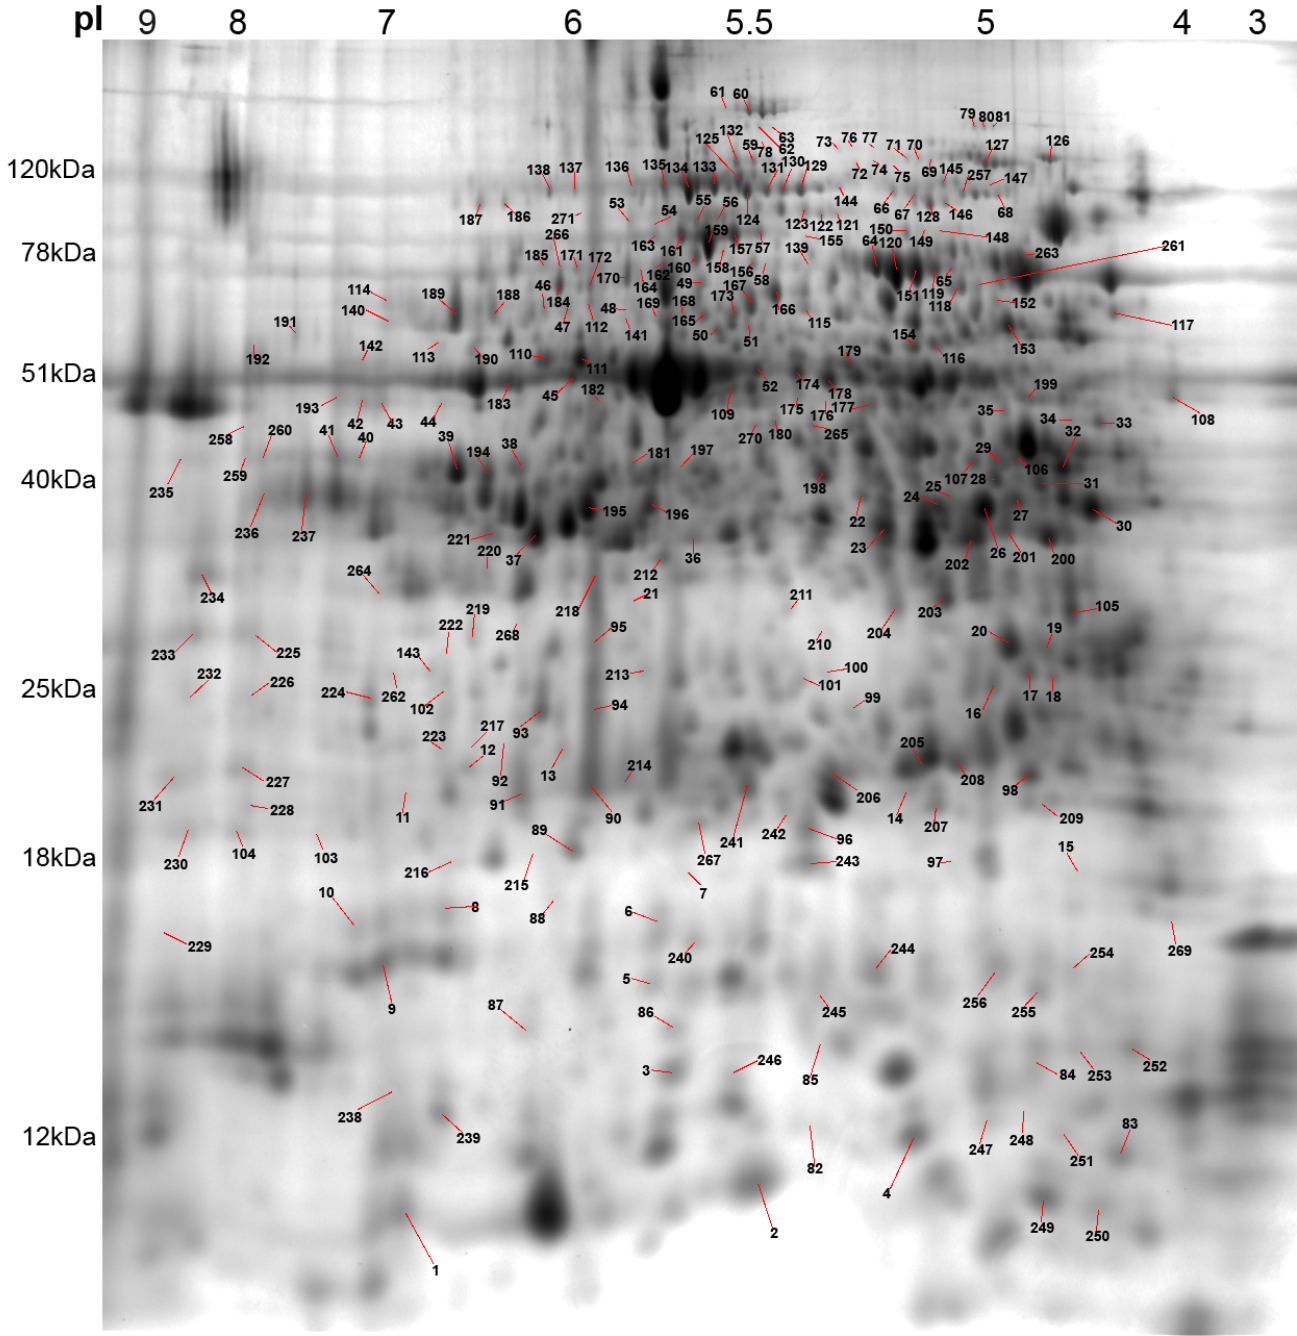

# Ger F3

## Spot 13- Ger F3

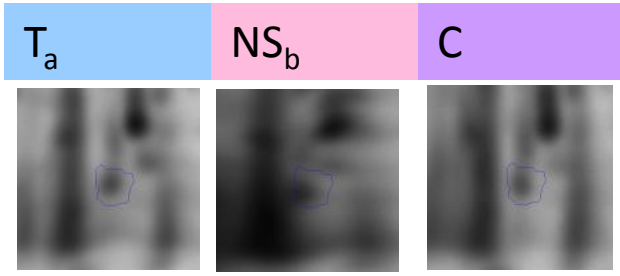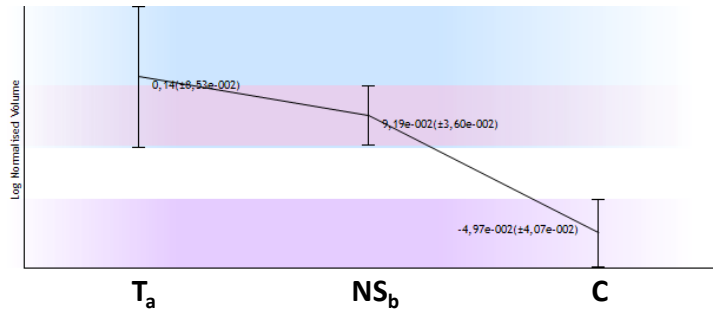

## Spot 26- Ger F3

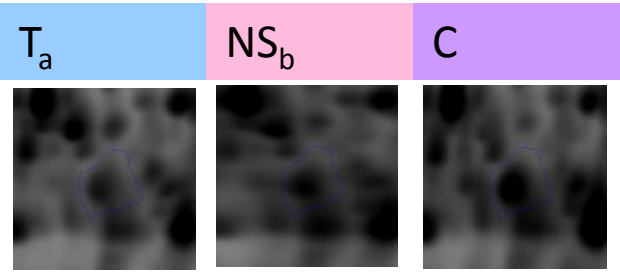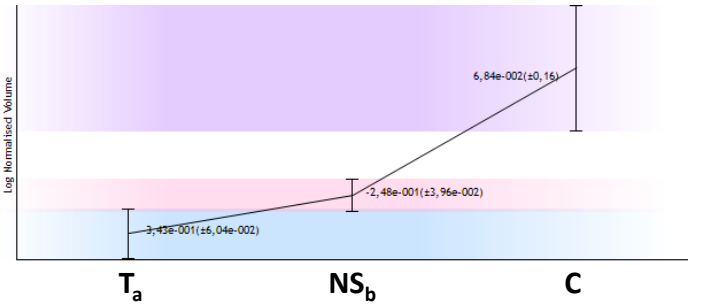

## Spot 27- Ger F3

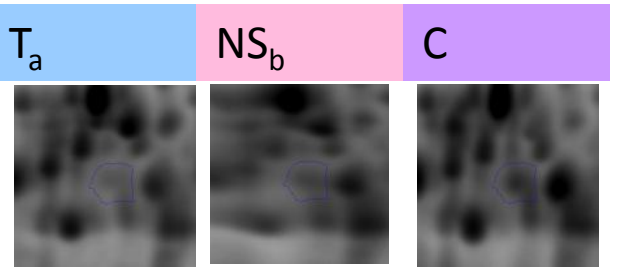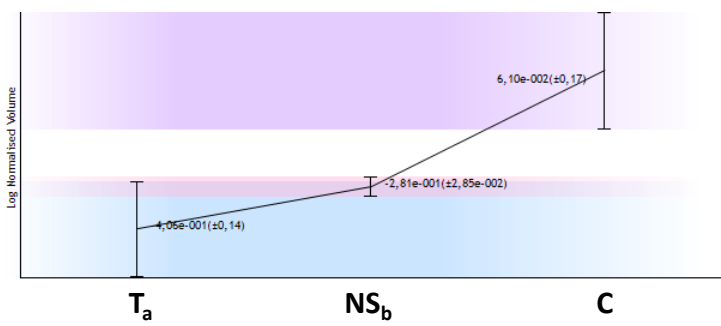

## Spot 64- Ger F3

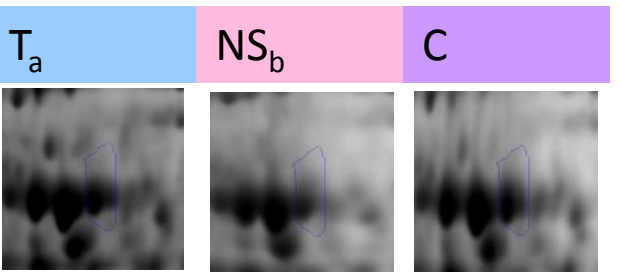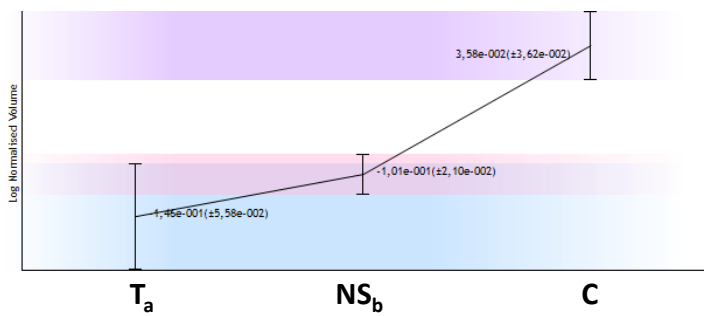

### Spot 69- Ger F3

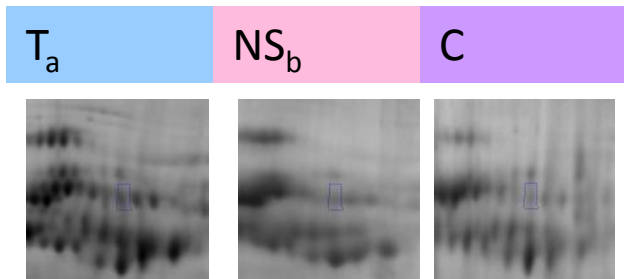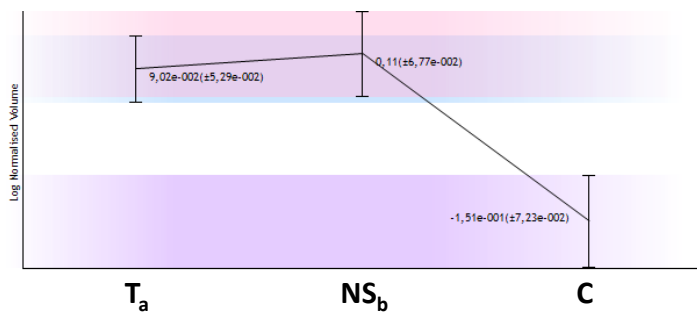

### Ger F5

#### Spot 97- Ger F5

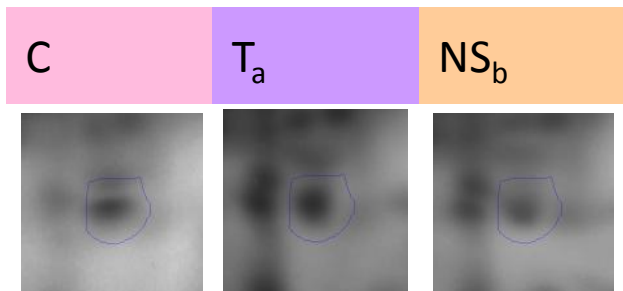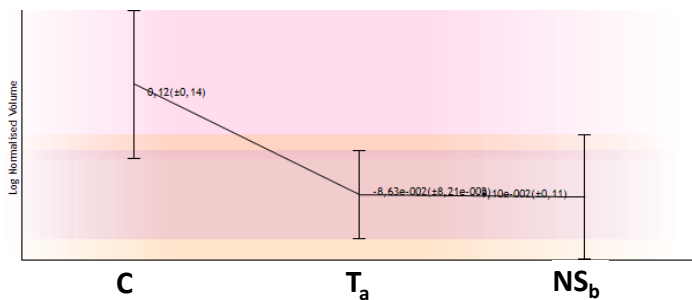

#### Spot 99- Ger F5

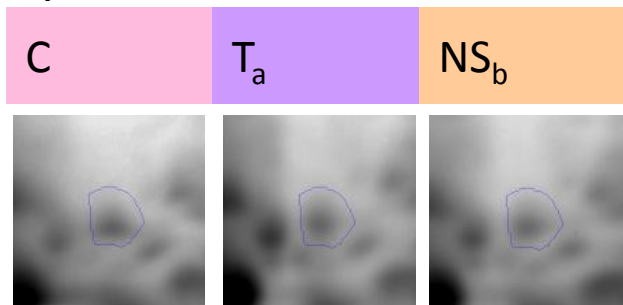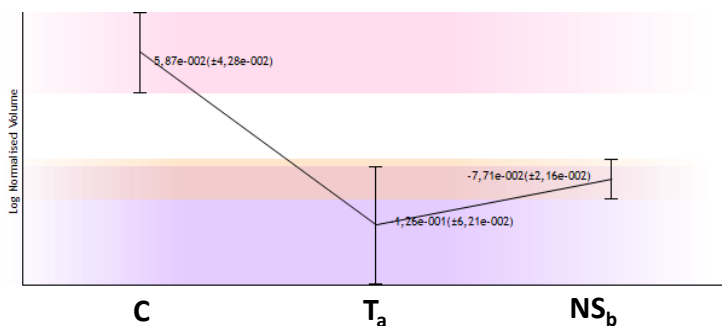

#### Spot 124- Ger F5

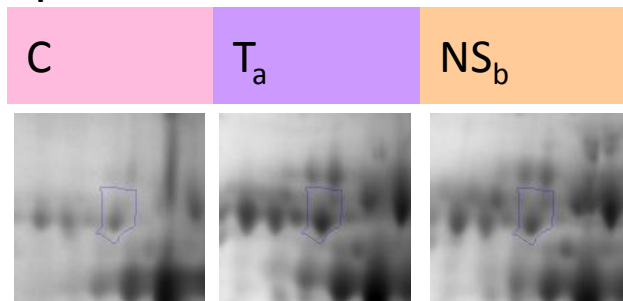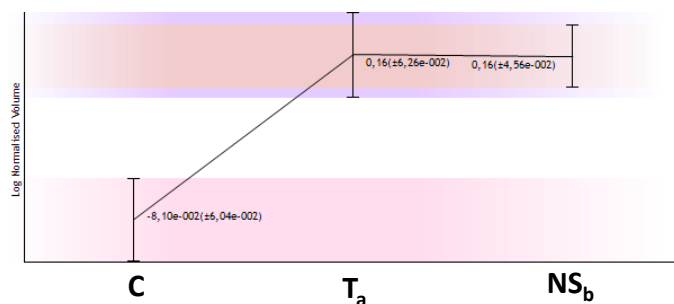

### Spot 129- Ger F5

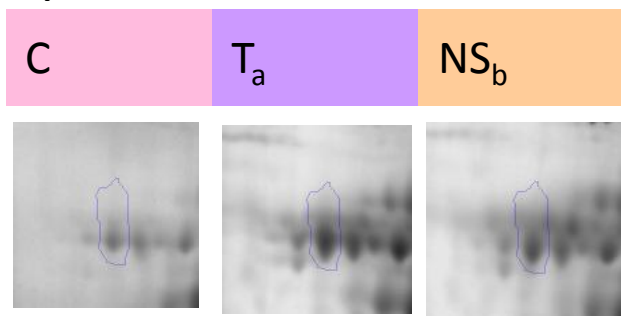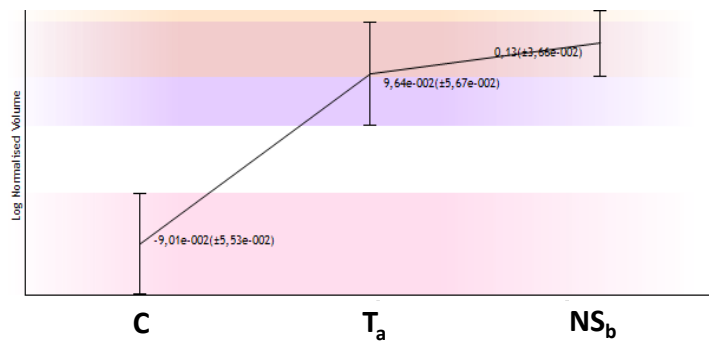

### Spot 131- Ger F5

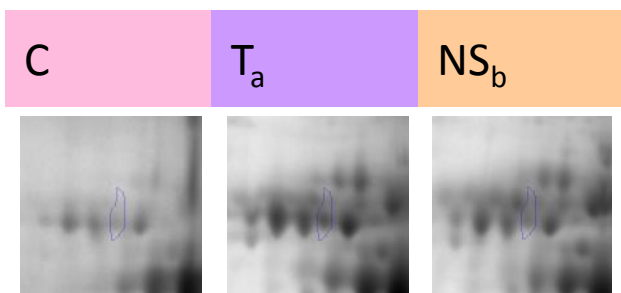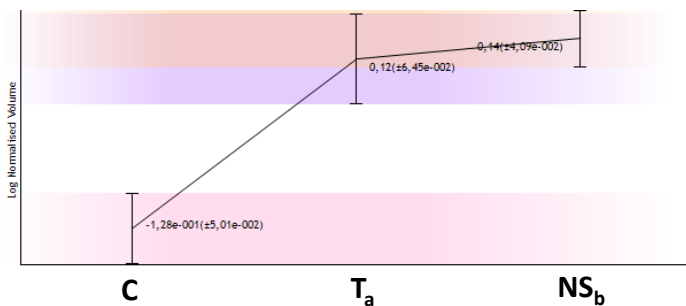

## Ger F6

### Spot 39- Ger F6

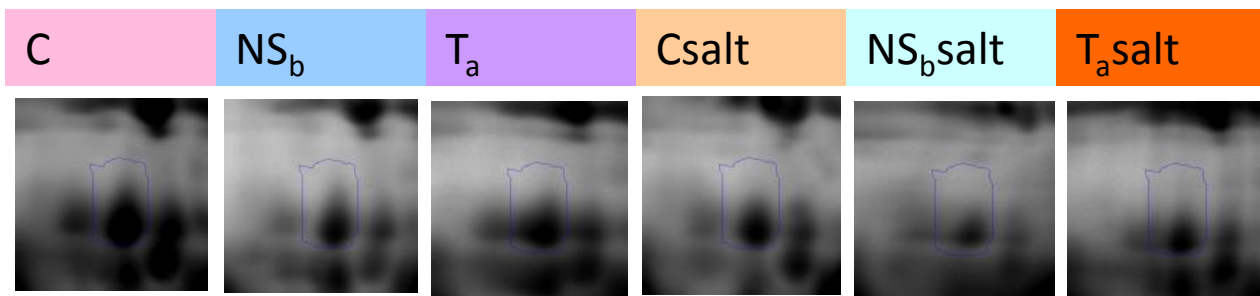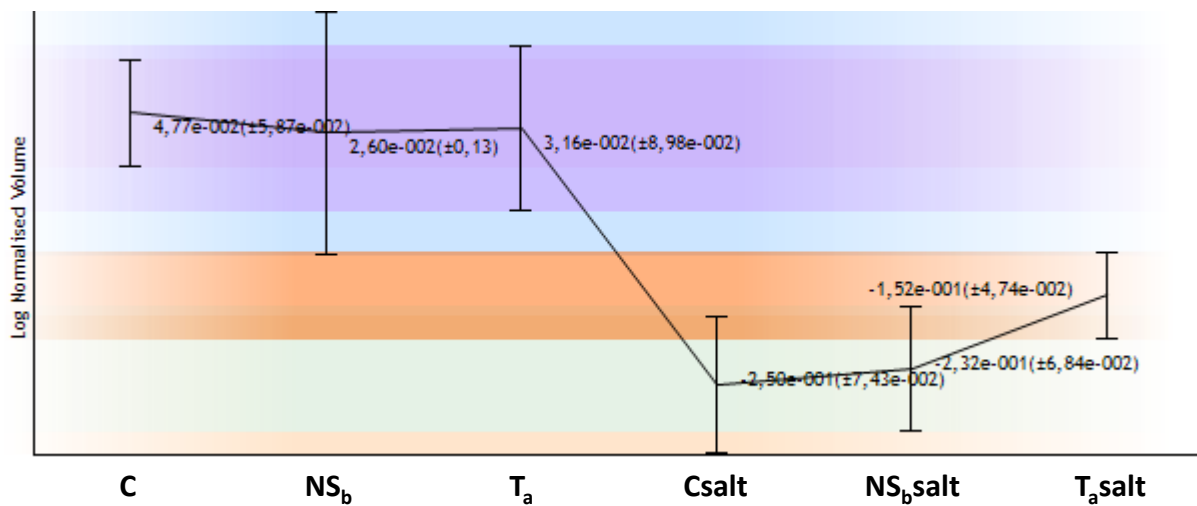

### Spot 165- Ger F6

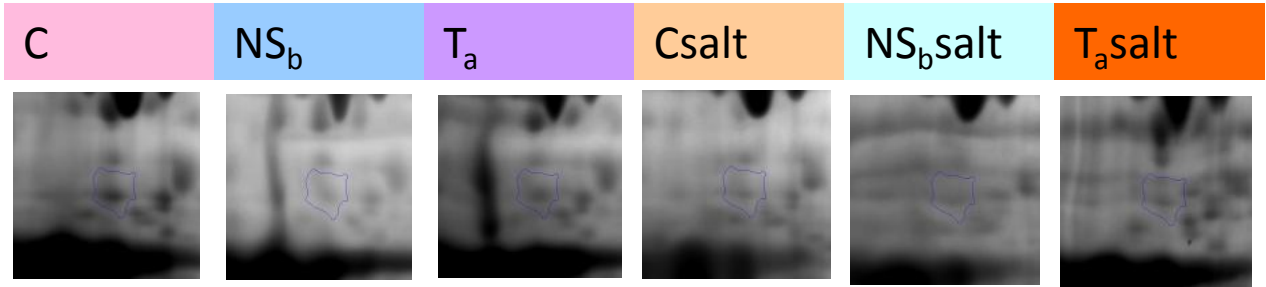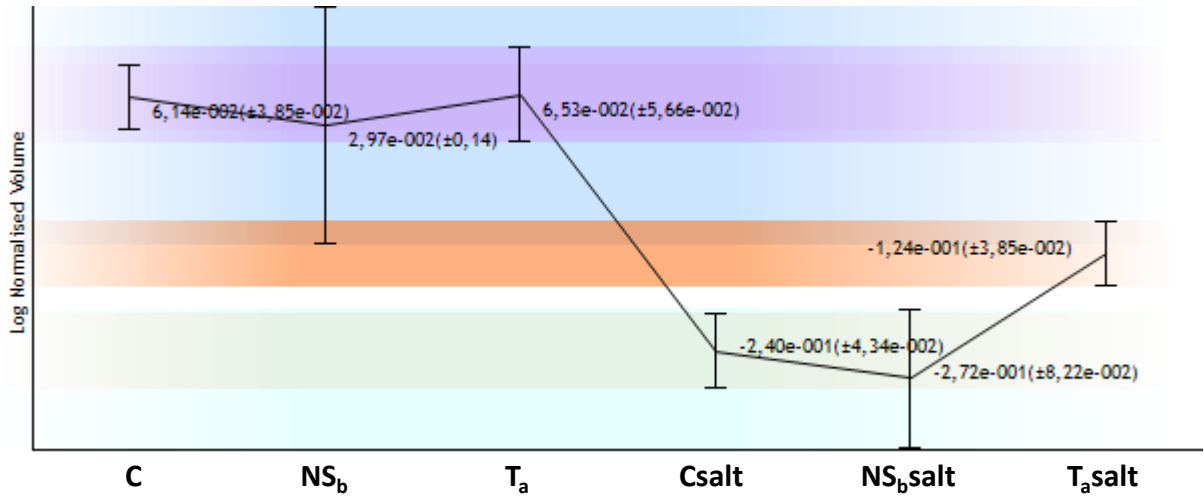

### Spot 190- Ger F6

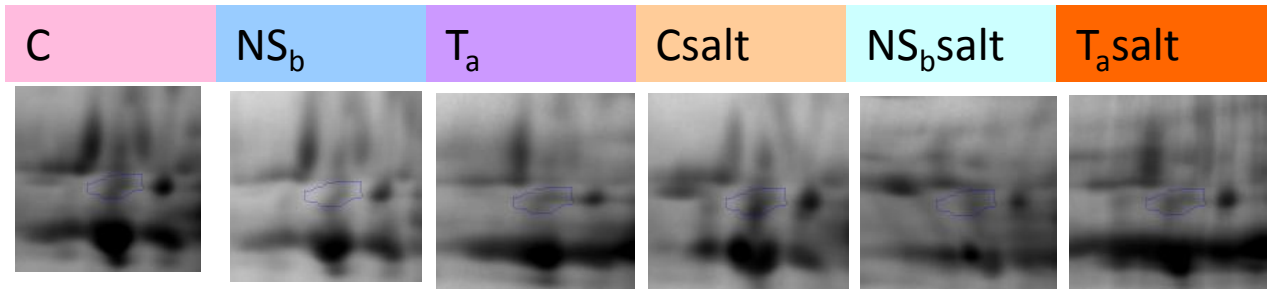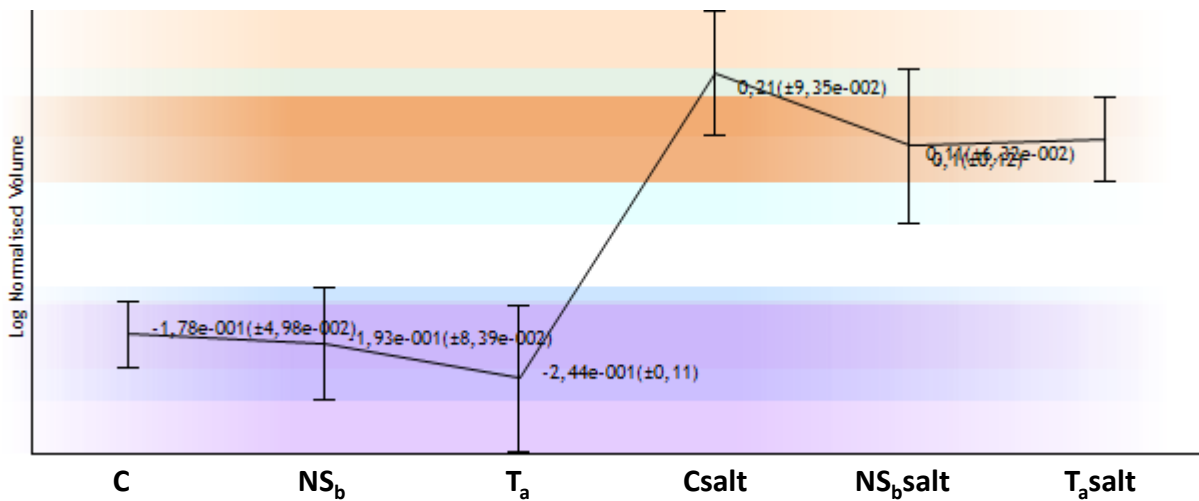

### Spot 198- Ger F6

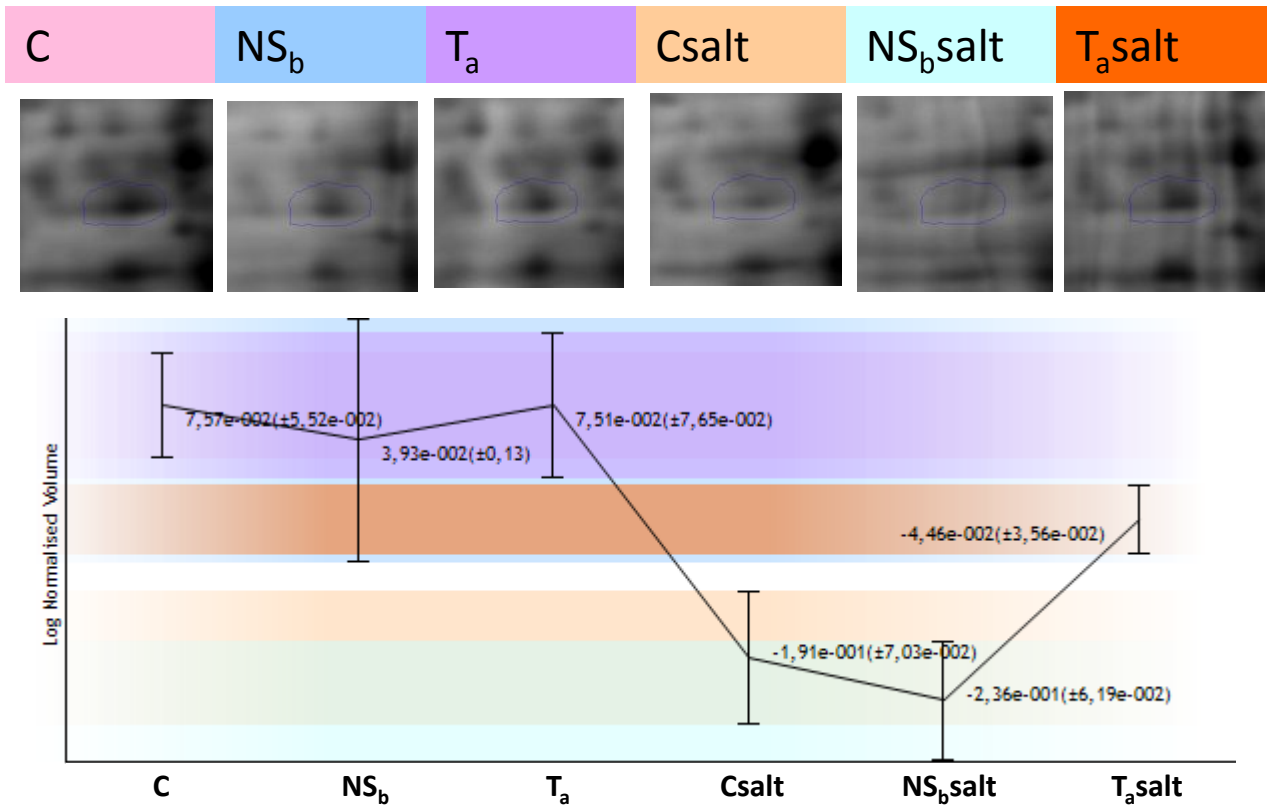

### Spot 230- Ger F6

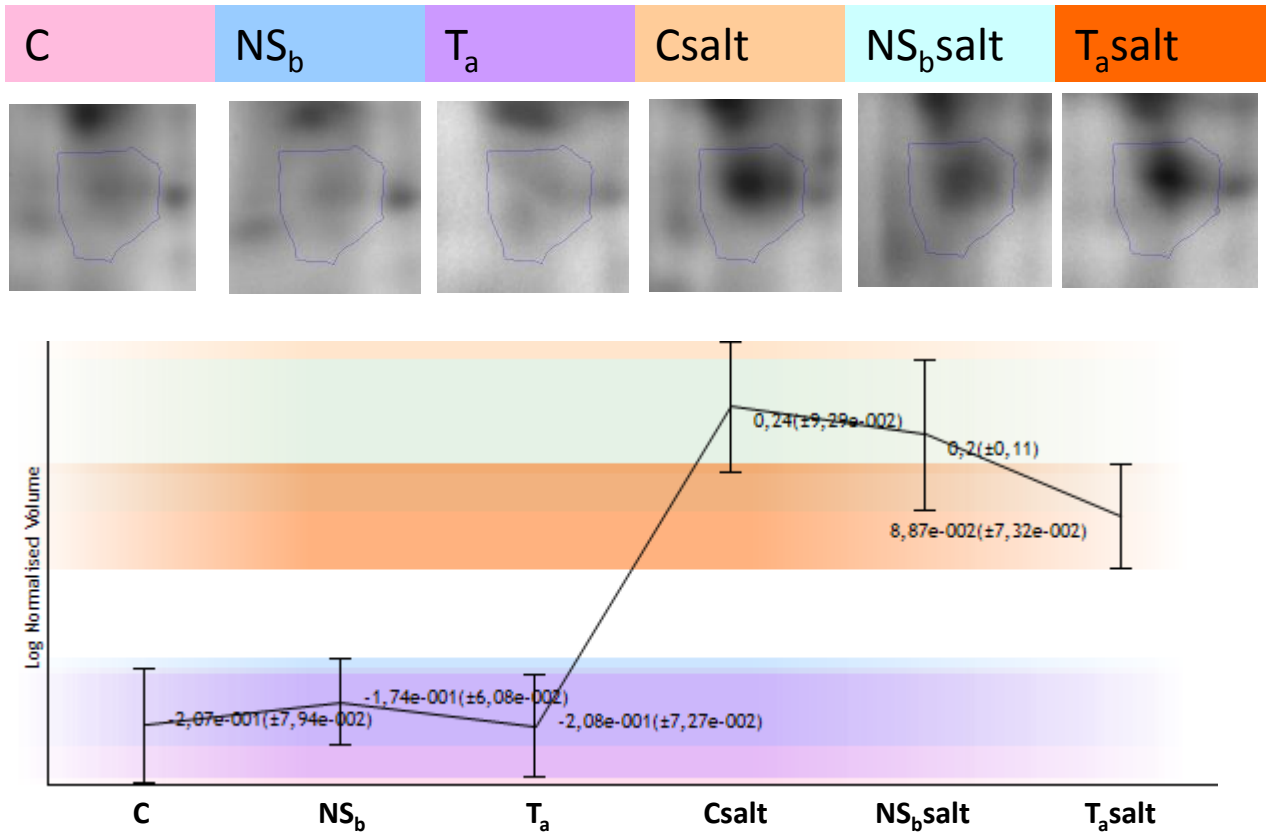



# Ger F8

## Spot 4- Ger F8

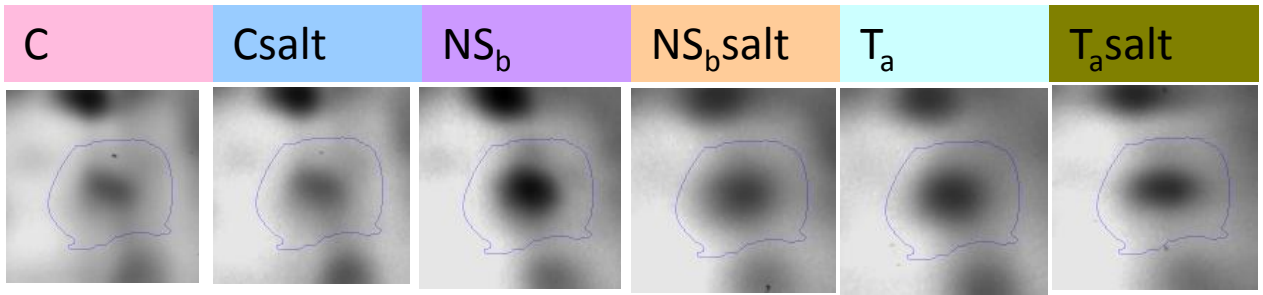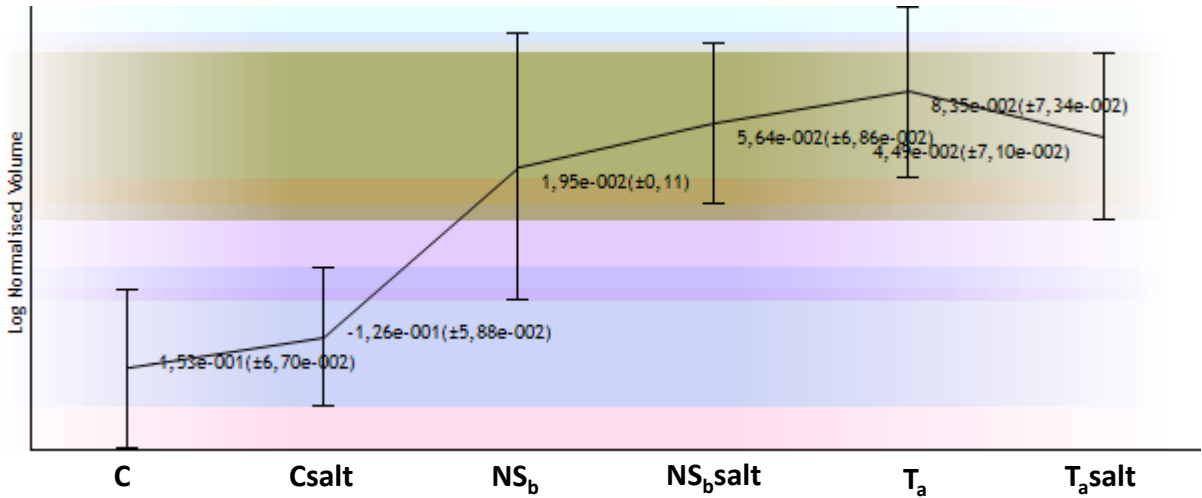

## Spot 115- Ger F8

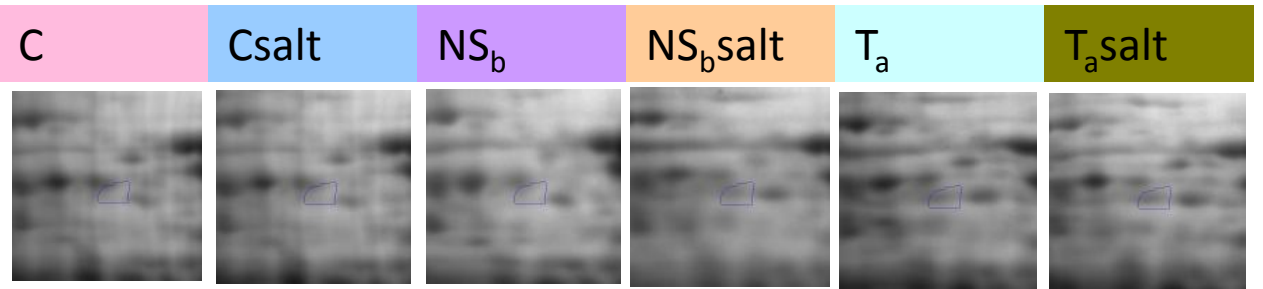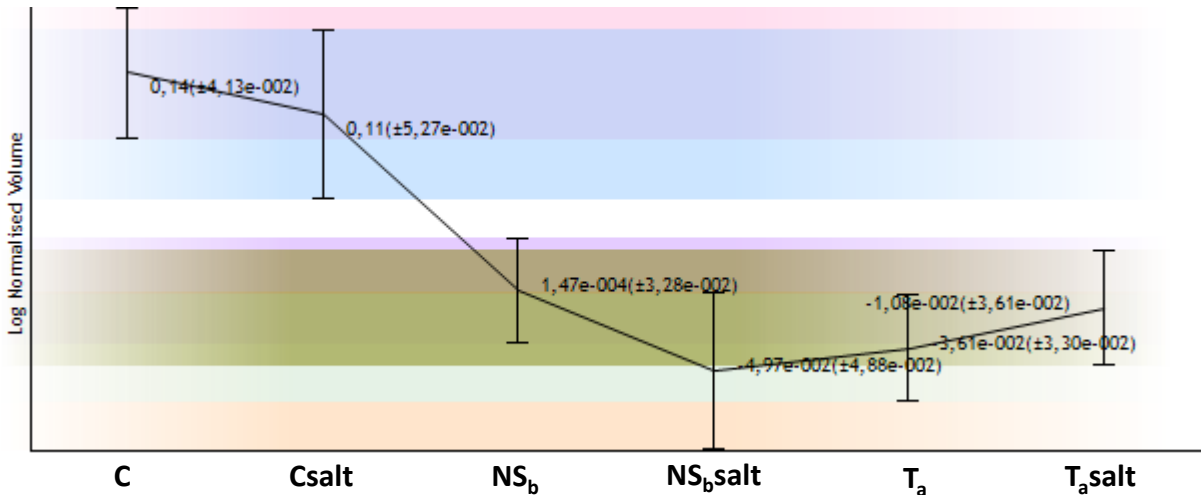

### Spot 180- Ger F8

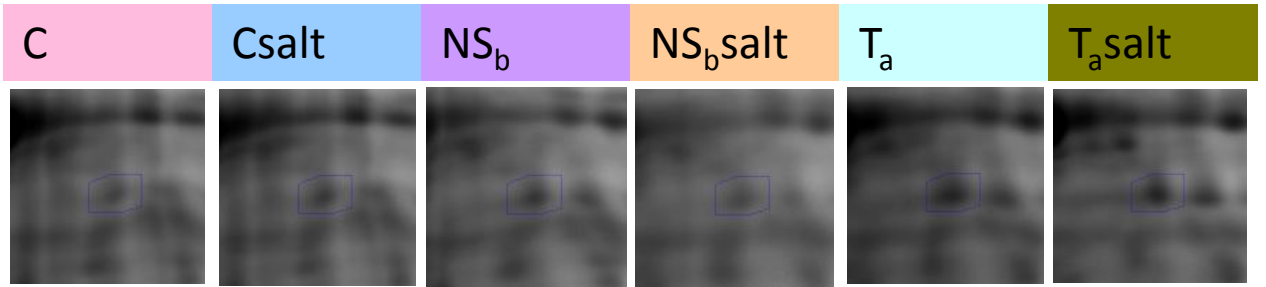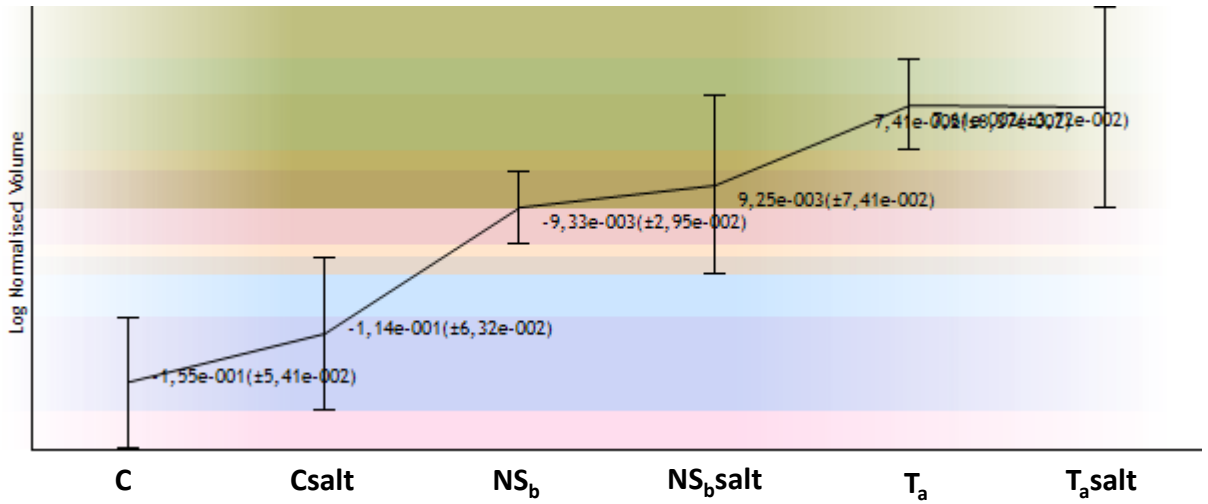

### Spot 226- Ger F8

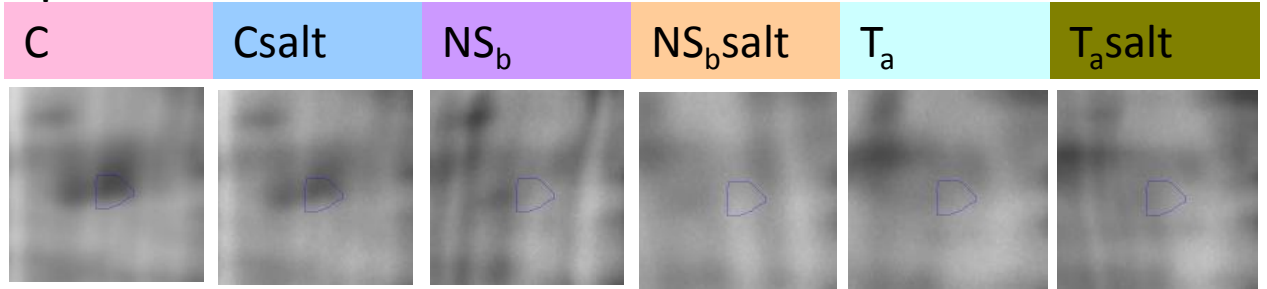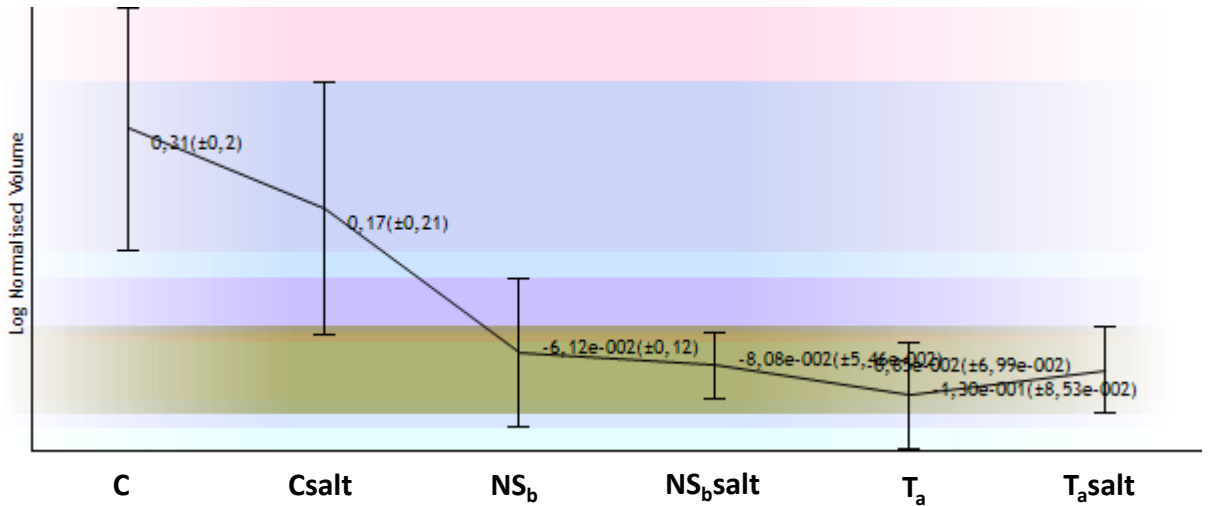

# Spot 244- Ger F8

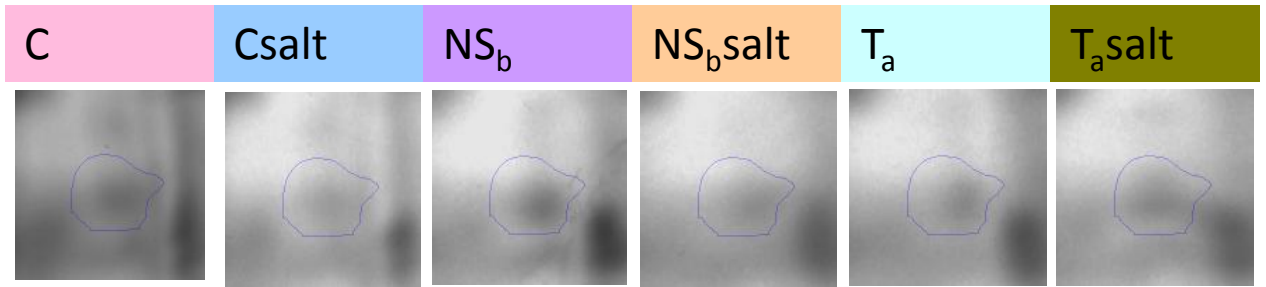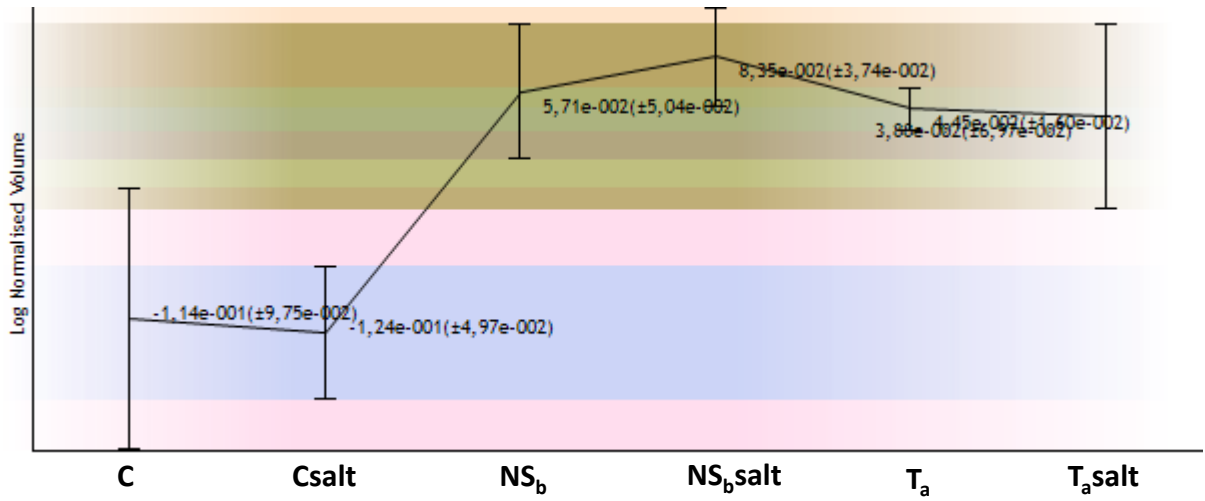

**Supporting Table S3-** Proteomics and Microarrays relation (salinity assay).

| Proteomics                                          |                                                                                |             |             |               | Microarrays                                         |                                                                                          |             |             |               |
|-----------------------------------------------------|--------------------------------------------------------------------------------|-------------|-------------|---------------|-----------------------------------------------------|------------------------------------------------------------------------------------------|-------------|-------------|---------------|
| Spot n°                                             | Most probable protein identification                                           | C vs. CSalt | T vs. Tsalt | NS vs. Nssalt | Affymetrix ID                                       | Identification                                                                           | C vs. Csalt | T vs. Tsalt | NS vs. Nssalt |
| <b>Photosynthesis related</b>                       |                                                                                |             |             |               | <b>Photosynthesis related</b>                       |                                                                                          |             |             |               |
| 90                                                  | Carbonic anhydrase gi 3345477                                                  | -2.3        | -1.2        | -1.5          | LOC_Os08g32840                                      | bifunctional monodehydroascorbate reductase and carbonic anhydrasenelectarin-3 precursor | +3.0        | +3.0        | +3.0          |
| 214                                                 |                                                                                | -1.7        |             |               |                                                     |                                                                                          |             |             |               |
| 218                                                 |                                                                                | -2.2        | -1.2        | -1.3          |                                                     |                                                                                          |             |             |               |
| 207                                                 | Chloroplast 23 kDa polypeptide of photosystem II gi 164375543                  | +1.8        |             | +1.6          | LOC_Os11g24140                                      | plastocyanin-like domain containing protein                                              | +6.7        | +5.3        | +5.2          |
| 1                                                   | RuBisCo small chain c gi 77554383                                              | -2.9        | -2.5        |               |                                                     |                                                                                          |             |             |               |
| 169                                                 | RuBisCo large subunit gi 290874507                                             | -1.9        |             | -1.6          |                                                     |                                                                                          |             |             |               |
| 194                                                 | RuBisCo gi 694137368                                                           | -1.6        | -1.6        | -1.6          |                                                     |                                                                                          |             |             |               |
| 182                                                 | RuBisCO, partial gi 440577954                                                  |             |             | -1.8          |                                                     |                                                                                          |             |             |               |
| 27                                                  | RuBisCo activase gi 108864712                                                  | +1.6        |             |               |                                                     |                                                                                          |             |             |               |
| 95                                                  | Phosphoglycerate kinase, chloroplastic gi 573944490 (Blast)                    | -1.9        |             |               |                                                     |                                                                                          |             |             |               |
| <b>Photosynthesis and pentose phosphate pathway</b> |                                                                                |             |             |               | <b>Photosynthesis and pentose phosphate pathway</b> |                                                                                          |             |             |               |
| 119                                                 | Transketolase 1 gi 55296168                                                    | -1.5        |             |               |                                                     |                                                                                          |             |             |               |
| 151                                                 | Transketolase 1 gi 55296168                                                    | -1.8        |             | -1.8          |                                                     |                                                                                          |             |             |               |
| <b>Photorespiration</b>                             |                                                                                |             |             |               | <b>Photorespiration</b>                             |                                                                                          |             |             |               |
| 105                                                 | Phosphoglycolate phosphatase region gi 116310328                               | -1.6        | -1.5        |               |                                                     |                                                                                          |             |             |               |
| 183                                                 | Glycine hydroxymethyltransferase gi 31126793                                   | -1.6        |             | -1.4          |                                                     |                                                                                          |             |             |               |
| <b>Carbohydrate metabolism</b>                      |                                                                                |             |             |               | <b>Carbohydrate metabolism</b>                      |                                                                                          |             |             |               |
| 195                                                 | Glyceraldehyde-3-phosphate dehydrogenase 2, cytosolic gi 573940046 (Blast)     | +1.5        | +1.2        | +1.2          | LOC_Os03g22120                                      | sucrose synthase                                                                         | +3.7        | +3.5        | +5.9          |
| 196                                                 |                                                                                | +1.6        |             |               | LOC_Os01g13570                                      | phosphoglycerate mutase                                                                  | +3.6        | +3.2        | +4.7          |
| 198                                                 | Glyceraldehyde-3-phosphate dehydrogenase B, chloroplastic gi 573923495 (Blast) | -1.8        | -1.3        | -1.9          | LOC_Os03g55090                                      | alpha-glucan phosphorylase isozyme                                                       | +2.6        | +3.0        | +2.9          |
| 202                                                 | Fructose-bisphosphate aldolase, chloroplastic gi 108864048                     | -1.6        | -1.4        | -1.6          | LOC_Os08g02700                                      | fructose-bisphosphate aldolase isozyme,                                                  | +2.5        | +1.9        | +3.2          |
| 41                                                  | Fructose-bisphosphate aldolase cytoplasmic gi 573915065 (Blast)                | +2.3        |             |               |                                                     |                                                                                          |             |             |               |
| 236                                                 |                                                                                | +1.6        | +1.3        |               |                                                     |                                                                                          |             |             |               |
| 237                                                 |                                                                                | +1.9        | +1.3        |               |                                                     |                                                                                          |             |             |               |
| 190                                                 | Phosphoglucose isomerase gi 639684                                             | +2.5        | +2.3        | +2.0          | LOC_Os08g31980                                      | trehalose-6-phosphate synthase                                                           | +2.5        | +4.1        | +4.6          |
| 200                                                 | Fructokinase 1 gi 385145615                                                    | -1.6        | -1.2        | -1.3          |                                                     |                                                                                          |             |             |               |
| 243                                                 | Adenosine diphosphate glucose pyrophosphatase                                  | +1.5        |             |               |                                                     |                                                                                          |             |             |               |

| Cell Wall polysaccharide metabolism      |                                                                                                                                    |      |      |      |
|------------------------------------------|------------------------------------------------------------------------------------------------------------------------------------|------|------|------|
|                                          | gij21322655                                                                                                                        |      |      |      |
| 170                                      | Glycosyl hydrolase family 38 gi 108864437                                                                                          | -1.5 | -1.3 | -1.5 |
| 188                                      | Glycosyl hydrolase family 3 gi 108711094                                                                                           | -1.5 | -1.2 | -1.2 |
| 189                                      | Glycosyl hydrolase family 3 gi 108711094                                                                                           | -1.9 | -1.2 | -1.4 |
| 115                                      | Beta-D-xylosidase 4 gi 357166259 (Blast)                                                                                           | -1.7 |      | -1.3 |
| 167                                      | Beta-D-xylosidase 4 gi 573942853                                                                                                   | -1.6 |      | -1.3 |
| 219                                      | RmlD substrate binding domain containing protein gi 108707480                                                                      | +3.2 |      | +1.7 |
| TCA/ glyoxylate cycle/ respiratory chain |                                                                                                                                    |      |      |      |
| 181                                      | Pyruvate dehydrogenase E1 component subunit alpha-1, mitochondrial-like gi 573920524                                               | +1.4 | +1.3 | +1.5 |
| 131                                      | Aconitate hydratase, cytoplasmic gi 108706066                                                                                      | -1.7 |      |      |
| 227                                      | dihydropyridoxyllysine-residue succinyltransferase component of 2-oxoglutarate dehydrogenase complex 1, mitochondrial gi 573939599 | +2.1 | +1.4 | +1.5 |
| 165                                      | Succinate dehydrogenase [ubiquinone] flavoprotein subunit, mitochondrial gi 474445992                                              | -2.0 | -1.6 | -2.0 |
| 168                                      | Succinate dehydrogenase [ubiquinone] flavoprotein subunit, mitochondrial gi 573951965 (Blast)                                      | -1.7 |      | -1.5 |
| Amines metabolism and nitrogen status    |                                                                                                                                    |      |      |      |
| 148                                      | 5-methyltetrahydropteroyltriglutamate-homocysteine methyltransferase gi 108862990                                                  | -1.6 |      |      |
| 149                                      |                                                                                                                                    | -1.7 |      |      |
| 161                                      |                                                                                                                                    | -1.9 | -1.2 |      |
| 163                                      | 5-methyltetrahydropteroyltriglutamate-homocysteine methyltransferase gi 108862992                                                  | -1.8 |      |      |
| 155                                      |                                                                                                                                    | -1.5 | +1.3 |      |
| 159                                      |                                                                                                                                    | -1.9 |      | -1.4 |
| 201                                      | Cysteine synthase, chloroplastic/chromoplastic gi 573946673                                                                        | -1.7 | -1.4 | -1.6 |
| 204                                      |                                                                                                                                    | +1.8 | +1.3 | +1.4 |

| Cell Wall polysaccharide metabolism      |                |                                                           |  |      |       |       |
|------------------------------------------|----------------|-----------------------------------------------------------|--|------|-------|-------|
|                                          | LOC_Os01g71340 | glycosyl hydrolases family 17                             |  | +7.8 | +7.2  | +9.8  |
|                                          | LOC_Os01g71830 |                                                           |  | +6.1 | +5.7  | +10.4 |
|                                          | LOC_Os01g71670 |                                                           |  | +2.6 | +2.2  | +3.8  |
|                                          | LOC_Os01g71820 |                                                           |  | +4.2 | +3.0  | +3.0  |
|                                          | LOC_Os10g28120 | glycosyl hydrolase                                        |  | +3.9 | +3.5  | +4.9  |
|                                          | LOC_Os11g47500 |                                                           |  | +4.4 | +4.7  | +4.6  |
|                                          | LOC_Os11g47600 |                                                           |  | +2.9 | +3.4  | +3.3  |
|                                          | LOC_Os02g01590 |                                                           |  | -3.2 | -4.1  | -2.8  |
|                                          | LOC_Os05g15770 |                                                           |  | +9.7 | +10.6 | +11.6 |
|                                          | LOC_Os07g35560 | glucan endo-1,3-beta-glucosidase precursor                |  | +2.3 | +5.3  | +4.0  |
|                                          | LOC_Os09g31430 | Os9bglu30 - beta-glucosidase                              |  | +3.2 | +4.2  | +3.3  |
|                                          | LOC_Os10g35070 | alpha-galactosidase precursor                             |  | +2.6 | +1.9  | +3.3  |
|                                          | LOC_Os08g44040 | rhamnogalacturonate lyase                                 |  | -8.4 | -5.7  | -11.2 |
|                                          | LOC_Os07g32630 | UDP-glucuronosyl and UDP-glucosyl transferase             |  | -3.0 | -2.5  | -2.5  |
|                                          | LOC_Os02g51930 | UDP-Glycosyltransferase family                            |  | +3.2 | +2.6  | +5.0  |
| TCA/ glyoxylate cycle/ respiratory chain |                |                                                           |  |      |       |       |
|                                          | LOC_Os01g41810 | cytochrome P450 72A1                                      |  | +3.6 | +3.1  | +4.8  |
|                                          | LOC_Os10g17260 |                                                           |  | -3.8 | -3.4  | -3.9  |
|                                          | LOC_Os02g09390 |                                                           |  | +3.1 | +3.5  | +2.9  |
|                                          | LOC_Os04g09920 | cytochrome P450                                           |  | +3.6 | +2.0  | +2.1  |
|                                          | LOC_Os06g37300 |                                                           |  | +3.1 | +2.3  | +3.7  |
|                                          | LOC_Os07g11739 |                                                           |  | +2.7 | +2.2  | +3.1  |
|                                          | LOC_Os08g39730 |                                                           |  | +3.6 | +3.2  | +4.4  |
|                                          | LOC_Os03g12820 | ATP synthase protein 8                                    |  | +5.9 | +4.3  | +7.0  |
|                                          | LOC_Os07g34520 | isocitrate lyase                                          |  | +2.4 | +2.8  | +4.3  |
| Amines metabolism and nitrogen status    |                |                                                           |  |      |       |       |
|                                          | LOC_Os10g28350 | 1,2-dihydroxy-3-keto-5-methylthiopentene dioxygenase      |  | +4.3 | +3.2  | +4.2  |
|                                          | LOC_Os03g09910 | aminotransferase, classes I and II, domain                |  | +8.5 | +11.1 | +10.5 |
|                                          | LOC_Os11g42510 | tyrosine aminotransferase                                 |  | +3.5 | +2.7  | +3.4  |
|                                          | LOC_Os10g25130 | aminotransferase, classes I and II, domain                |  | +3.3 | +3.0  | +3.2  |
|                                          | LOC_Os08g04540 | decarboxylase                                             |  | +2.6 | +2.7  | +3.3  |
|                                          | LOC_Os02g54254 | lysine-ketoglutarate reductase/saccharopine dehydrogenase |  | +4.9 | +4.8  | +7.1  |
|                                          | LOC_Os03g63330 | aspartokinase                                             |  | +5.1 | +3.5  | +4.2  |
|                                          | LOC_Os03g18130 | asparagine synthetase                                     |  | +2.8 | +2.7  | +3.5  |

|                                                  |                                                                      |      |      |      |
|--------------------------------------------------|----------------------------------------------------------------------|------|------|------|
| 178                                              | Adenosylhomocysteinase-like gij573961524                             | -2.2 |      | -1.4 |
| 179                                              | Adenosylhomocysteinase-like gij29367605                              | -1.6 |      | -1.3 |
| 154                                              | Ketol-Acid Reductoisomerase, chain A gij226887786                    | -1.7 | -1.5 | -1.4 |
| 209                                              | B0616E02-H0507E05.5 gij116310889                                     | +1.6 |      | +1.5 |
| 173                                              | Ferredoxin--nitrite reductase, chloroplastic gij75102800             | -2.3 | -1.3 | -1.9 |
| 85                                               | S-adenosylmethionine synthase (MAT) gij3024122                       | +2.0 | +1.3 | +1.7 |
| 180                                              | S-adenosylmethionine synthase (MAT) gij17529621                      | -1.5 |      |      |
| <b>Glycine cleavage system</b>                   |                                                                      |      |      |      |
| 39                                               | Aminomethyltransferase, mitochondrial gij357166054 (Blast)           | -2.0 | -1.5 | -1.8 |
| <b>Lipid metabolism</b>                          |                                                                      |      |      |      |
| 113                                              | ATP-citrate synthase beta chain protein 1 gij357131914               | +1.5 |      |      |
| <b>Metabolism</b>                                |                                                                      |      |      |      |
| 184                                              | Formate-tetrahydrofolate ligase gij51536102                          | -3.3 |      | -1.4 |
| 224                                              | NADH-cytochrome b5 reductase gij514776060 (Blast)                    | +1.8 |      | +1.3 |
| 211                                              | Esterase_lipase region gij125526544                                  | +2.4 | +1.4 | +1.7 |
| 17                                               | Soluble inorganic pyrophosphatase 1, chloroplastic gij573922996      | -1.7 |      |      |
| 220                                              | Oxidoreductase, aldo/keto reductase family gij413924063              | -1.6 | -1.5 | -1.5 |
| 239                                              | Nucleoside diphosphate kinase 4 gij573946659 (Blast)                 | +1.8 | +1.4 | +1.5 |
| 210                                              | Pyridoxine 5'-phosphate (PNP) oxidase gij218199883                   | +1.8 |      |      |
| <b>Modifying, storing and degrading proteins</b> |                                                                      |      |      |      |
| 118                                              | DnaK-type molecular chaperone gij46805772                            | -1.6 | -1.4 |      |
| 153                                              | Chaperonin 60 subunit beta 1, chloroplastic, gij573946766            | -1.7 |      | -1.3 |
| 262                                              | Alpha 4 subunit of 20S proteasome, gij9186906                        | +1.6 |      |      |
| 91                                               | Proteasome subunit beta type-4-like gij573957260                     | -1.9 | -1.2 | -1.5 |
| 104                                              | DSBA-like thioredoxin domain containing protein gij195648623 (Blast) | +1.7 | +1.5 | +1.6 |
| 65                                               | Thimet oligopeptidase-like gij573921154 (Blast)                      | -1.3 |      | -1.5 |
| 130                                              | Prolyl oligopeptidase family protein gij78708638                     | -1.6 |      |      |
| 257                                              | Cytosol alanyl aminopeptidase gij565830595                           | -2.1 |      |      |
| 255                                              | Peptidyl-prolyl cis-trans isomerase gij13486733                      | +1.8 |      |      |

|                                                  |                                                              |       |       |       |
|--------------------------------------------------|--------------------------------------------------------------|-------|-------|-------|
| LOC_Os04g58390                                   | allantoinase                                                 | -5.2  | -5.3  | -5.8  |
| LOC_Os04g40040                                   | copper/topaquinone oxidase family                            | -2.7  | -3.1  | -3.2  |
| LOC_Os09g25810                                   | nodulin                                                      | -2.4  | -3.0  | -3.6  |
| LOC_Os06g46740                                   | early nodulin 20 precursor                                   | +6.9  | +3.8  | +9.0  |
| LOC_Os07g49270                                   | AMP deaminase                                                | +2.6  | +2.3  | +3.4  |
| LOC_Os04g14690                                   | flavin-containing monooxygenase family protein               | +2.3  | +5.5  | +4.5  |
| LOC_Os07g34570                                   | Putative thiamine biosynthesis protein                       | +10.9 | +13.3 | +14.5 |
| LOC_Os11g19840                                   | O-methyltransferase                                          | +11.9 | +15.5 | +22.8 |
| LOC_Os04g11970                                   | O-methyltransferase                                          | -3.5  | -2.4  | -2.7  |
| <b>Glycine cleavage system</b>                   |                                                              |       |       |       |
| <b>Lipid metabolism</b>                          |                                                              |       |       |       |
| LOC_Os12g37260                                   | lipoxygenase 2.1, chloroplast precursor                      | +11.9 | +14.1 | +12.4 |
| LOC_Os02g37654                                   | lecithin:cholesterol acyltransferase                         | -2.7  | -3.2  | -3.1  |
| LOC_Os03g52860                                   | lipoxygenase                                                 | +4.3  | +3.6  | +4.8  |
| LOC_Os03g51010                                   | Putative lipase                                              | +2.9  | +2.2  | +3.1  |
| LOC_Os08g37210                                   | patatin                                                      | +6.5  | +4.2  | +4.7  |
| LOC_Os07g34280                                   | CXE carboxylesterase                                         | +2.7  | +3.7  | +3.5  |
| LOC_Os04g43200                                   | Peroxygenase                                                 | +5.7  | +5.3  | +9.5  |
| <b>Metabolism</b>                                |                                                              |       |       |       |
| LOC_Os01g54030                                   | NADP-dependent malic enzyme                                  | +6.4  | +5.0  | +12.6 |
| LOC_Os12g12590                                   | NADP-dependent oxidoreductase                                | +3.4  | +2.8  | +2.1  |
| LOC_Os12g27350                                   | 10-deacetylbaicatin III 10-O-acetyltransferase               | +10.0 | +6.2  | +7.5  |
| LOC_Os12g27220                                   | transferase family protein                                   | +2.6  | +3.1  | +3.2  |
| LOC_Os12g27254                                   |                                                              | +13.8 | +15.3 | +8.9  |
| LOC_Os08g02030                                   |                                                              | +2.6  | +2.9  | +3.3  |
| <b>Modifying, storing and degrading proteins</b> |                                                              |       |       |       |
| LOC_Os02g32520                                   | Chaperone protein ClpD1, chloroplastic                       | +3.3  | +2.7  | +5.6  |
| LOC_Os01g03310                                   | BBT11 - Bowman-Birk type bran trypsin inhibitor              | +5.1  | +3.6  | +4.9  |
| LOC_Os01g03320                                   | BBT12 - Bowman-Birk type bran trypsin inhibitor              | +3.8  | +5.2  | +6.3  |
| LOC_Os01g03360                                   | BBT15 - Bowman-Birk type bran trypsin inhibitor              | +3.7  | +3.5  | +5.1  |
| LOC_Os01g04050                                   | BBT12 - Bowman-Birk type bran trypsin inhibitor              | +3.3  | +3.9  | +4.3  |
| LOC_Os10g36070                                   | LTPL155 - Protease inhibitor/seed storage/LTP family protein | +3.6  | +3.1  | +3.6  |
| LOC_Os10g36090                                   | LTPL156 - Protease inhibitor/seed storage/LTP family protein | +3.7  | +3.5  | +6.7  |
| LOC_Os04g46810                                   | LTPL120 - Protease inhibitor/seed storage/LTP family         | -3.1  | -3.7  | -4.2  |
| LOC_Os10g36100                                   | LTPL157 - Protease inhibitor/seed storage/LTP family protein | +3.5  | +2.8  | +2.8  |

|                                                                 |                                                                             |      |      |      |
|-----------------------------------------------------------------|-----------------------------------------------------------------------------|------|------|------|
|                                                                 | (Blast)                                                                     |      |      |      |
| 139                                                             | Xaa-Pro aminopeptidase 2 gj 52076499                                        | -1.8 |      | -1.5 |
| 245                                                             | Immunophilin/FKBP-type peptidyl-prolyl cis-trans isomerase-like gj 34393414 | +1.5 |      |      |
| <b>Signal transduction, stress, defense response, apoptosis</b> |                                                                             |      |      |      |
| 84                                                              | Root specific pathogenesis-related protein 10 gj 38678114                   | +2.8 | +1.9 | +2.1 |
| 223                                                             | Germin-like protein 1 gj 573912743 (Blast)                                  | +1.8 | +1.8 | +1.8 |
| 6                                                               | Abscisic stress ripening protein 2 gj 149391461                             | +2.1 |      | +1.3 |
| 94                                                              | Small Ras-related GTP-binding protein gj 16903082                           | -2.3 | -1.4 | -1.4 |
| 21                                                              | Chitinase Chain A, Crystal Structure Of Class I gj 146386456                | +6.4 | +3.1 | +3.4 |
| 152                                                             | Heat shock protein 90 gj 294717842                                          | +2.2 |      |      |
| 246                                                             | heat shock protein B, 16.9 kDa gj 312983209                                 | +2.6 | +1.4 | +1.8 |
| 171                                                             | hsp70-Hsp90 organizing protein gj 721665923 (Blast)                         | -2.1 | -1.4 | -1.5 |
| 231                                                             | Thaumatococcus, pathogenesis-related family protein gj 115489698            | +1.7 | +1.2 | +1.4 |

|                                                                 |                                                               |       |       |       |
|-----------------------------------------------------------------|---------------------------------------------------------------|-------|-------|-------|
| LOC_Os04g46820                                                  | LTPL121 - Protease inhibitor/seed storage/LTP family protein  | -3.0  | -2.9  | -3.3  |
| LOC_Os04g33920                                                  | LTPL102 - Protease inhibitor/ seed storage/LTP family protein | +2.9  | +3.3  | +3.3  |
| LOC_Os03g52390                                                  | PIII1 - Proteinase inhibitor II family                        | +4.3  | +3.6  | +4.8  |
| LOC_Os03g54130                                                  | cysteine protease 1                                           | -7.4  | -8.3  | -12.5 |
| LOC_Os04g01710                                                  | cysteine proteinase At4g11310                                 | +2.9  | +3.1  | +3.4  |
| LOC_Os09g39070                                                  | thiol protease SEN102                                         | -2.8  | -2.4  | -3.7  |
| LOC_Os09g19800                                                  | aminopeptidase                                                | +7.1  | +4.8  | +6.0  |
| LOC_Os01g60730                                                  | RING-H2 finger protein                                        | +2.3  | +3.6  | +3.3  |
| LOC_Os11g34460                                                  | OsFBO10 - F-box and other domain containing protein           | +2.4  | +5.7  | +3.4  |
| LOC_Os01g58280                                                  | Subtilisin-like serine protease                               | +3.8  | +2.7  | +6.2  |
| LOC_Os01g42860                                                  | Subtilisin-chymotrypsin inhibitor                             | +16.8 | +12.6 | +31.7 |
| LOC_Os12g36240                                                  | Subtilisin-chymotrypsin inhibitor CI-1B                       | +6.2  | +6.4  | +10.8 |
| LOC_Os04g03810                                                  | OsSub38 - Putative Subtilisin                                 | +2.5  | +4.2  | +3.2  |
| LOC_Os01g06740                                                  | ribosome inactivating protein                                 | +11.5 | +9.5  | +12.9 |
| LOC_Os11g08100                                                  | eukaryotic aspartyl protease                                  | +2.4  | +3.0  | +3.1  |
| LOC_Os06g16640                                                  | carboxyl-terminal peptidase                                   | +3.1  | +2.9  | +3.2  |
| <b>Signal transduction, stress, defense response, apoptosis</b> |                                                               |       |       |       |
| LOC_Os01g14550                                                  | pathogen-related protein                                      | +2.3  | +3.3  | +3.0  |
| LOC_Os12g36880                                                  | pathogenesis-related Bet v I family protein                   | +4.2  | +2.7  | +4.9  |
| LOC_Os01g32780                                                  | universal stress protein domain containing protein            | +4.7  | +4.3  | +5.5  |
| LOC_Os02g47840                                                  | universal stress protein domain containing protein            | +2.4  | +2.1  | +3.3  |
| LOC_Os10g39680                                                  | CHIT14 - Chitinase family protein precursor                   | +3.6  | +3.1  | +4.8  |
| LOC_Os04g41620                                                  | CHIT2 - Chitinase family protein precursor                    | +6.4  | +5.6  | +5.8  |
| LOC_Os04g41680                                                  | CHIT3 - Chitinase family protein precursor                    | +3.1  | +3.2  | +3.9  |
| LOC_Os05g33140                                                  | CHIT5 - Chitinase family protein precursor                    | +3.0  | +2.2  | +3.1  |
| LOC_Os06g51050                                                  | CHIT7 - Chitinase family protein precursor                    | +6.4  | +6.8  | +8.0  |
| LOC_Os06g51060                                                  | CHIT8 - Chitinase family protein precursor                    | +4.6  | +4.1  | +5.1  |
| LOC_Os04g41640                                                  | HEV2 - Hevein family protein precursor                        | +3.2  | +2.8  | +3.2  |
| LOC_Os11g37940                                                  | WIP2 - Wound-induced protein precursor                        | +5.5  | +4.2  | +5.6  |
| LOC_Os11g37950                                                  | WIP3 - Wound-induced protein precursor                        | +5.4  | +3.4  | +6.6  |
| LOC_Os11g37970                                                  | WIP5 - Wound-induced protein precursor                        | +5.6  | +4.9  | +7.2  |
| LOC_Os04g01740                                                  | Heat shock protein                                            | +2.8  | +2.2  | +3.2  |
| LOC_Os03g15960                                                  | hsp20/alpha crystallin family protein                         | +3.1  | +2.4  | +3.1  |
| LOC_Os03g16920                                                  | Heat shock cognate 70 kDa protein                             | +2.7  | +2.3  | +3.7  |
| LOC_Os12g43450                                                  | Thaumatococcus                                                | +4.0  | +3.9  | +4.5  |
| LOC_Os12g43380                                                  | Thaumatococcus                                                | +22.7 | +7.4  | +23.3 |

|     |                                                                |      |  |      |                |                                                                 |       |       |       |
|-----|----------------------------------------------------------------|------|--|------|----------------|-----------------------------------------------------------------|-------|-------|-------|
|     |                                                                |      |  |      | LOC_Os12g43410 |                                                                 | +3.1  | +3.4  | +2.7  |
|     |                                                                |      |  |      | LOC_Os03g46070 |                                                                 | +4.1  | +3.0  | +4.0  |
| 249 | SalT gene product gjl2072553                                   | +2.3 |  | +2.2 | LOC_Os11g26780 | dehydrin                                                        | +6.0  | +4.1  | +14.4 |
| 250 |                                                                | +2.3 |  |      | LOC_Os11g26790 |                                                                 | +11.2 | +6.1  | +12.7 |
| 186 | Monocopper oxidase-like protein SKU5-like gjl573959489 (Blast) | -1.6 |  | -1.3 | LOC_Os12g38170 | osmotin                                                         | +3.1  | +2.7  | +3.8  |
|     |                                                                |      |  |      | LOC_Os03g17790 | OsRC12-5 - Putative low temperature and salt responsive protein | +4.2  | +3.6  | +5.4  |
|     |                                                                |      |  |      | LOC_Os01g28450 | SCP-like extracellular protein                                  | +21.9 | +7.0  | +23.9 |
|     |                                                                |      |  |      | LOC_Os01g28500 |                                                                 | +5.3  | +4.0  | +4.4  |
|     |                                                                |      |  |      | LOC_Os10g11500 |                                                                 | +3.9  | +3.2  | +2.7  |
|     |                                                                |      |  |      | LOC_Os07g03279 |                                                                 | +3.7  | +3.2  | +2.9  |
|     |                                                                |      |  |      | LOC_Os07g03319 |                                                                 | +8.6  | +8.5  | +10.3 |
|     |                                                                |      |  |      | LOC_Os07g03368 |                                                                 | +3.6  | +3.2  | +2.7  |
|     |                                                                |      |  |      | LOC_Os07g03409 |                                                                 | +6.3  | +5.3  | +6.0  |
|     |                                                                |      |  |      | LOC_Os07g03458 |                                                                 | +3.7  | +3.1  | +3.0  |
|     |                                                                |      |  |      | LOC_Os07g03499 |                                                                 | +6.3  | +5.3  | +6.1  |
|     |                                                                |      |  |      | LOC_Os07g03730 |                                                                 | +12.3 | +6.8  | +9.2  |
|     |                                                                |      |  |      | LOC_Os07g03288 |                                                                 | +24.7 | +13.2 | +19.7 |
|     |                                                                |      |  |      | LOC_Os07g03377 |                                                                 | +24.7 | +13.2 | +19.7 |
|     |                                                                |      |  |      | LOC_Os07g03467 |                                                                 | +24.5 | +13.6 | +18.4 |
|     |                                                                |      |  |      | LOC_Os07g25050 |                                                                 | +2.6  | +3.5  | +2.4  |
|     |                                                                |      |  |      | LOC_Os07g25060 |                                                                 | +3.5  | +4.7  | +3.1  |
|     |                                                                |      |  |      | LOC_Os07g24830 |                                                                 | +5.0  | +7.1  | +4.3  |
|     |                                                                |      |  |      | LOC_Os10g09850 | EF hand family protein                                          | +3.6  | +3.1  | +5.0  |
|     |                                                                |      |  |      | LOC_Os01g26270 | OsWAK7 - OsWAK receptor-like protein kinase                     | -3.0  | -2.4  | -2.8  |
|     |                                                                |      |  |      | LOC_Os08g10250 | SHR5-receptor-like kinase                                       | -4.6  | -3.9  | -3.7  |
|     |                                                                |      |  |      | LOC_Os08g10300 | SHR5-receptor-like kinase                                       | +2.3  | +3.2  | +2.7  |
|     |                                                                |      |  |      | LOC_Os07g43570 | DUF26 kinase                                                    | +3.2  | +4.7  | +5.5  |
|     |                                                                |      |  |      | LOC_Os11g31540 | Brassinosteroid insensitive 1-associated receptor kinase 1      | +3.2  | +2.5  | +4.5  |
|     |                                                                |      |  |      | LOC_Os01g62900 | amino acid kinase                                               | +3.5  | +3.4  | +5.1  |
|     |                                                                |      |  |      | LOC_Os02g02780 | protein kinase family protein                                   | +4.0  | +6.8  | +5.0  |
|     |                                                                |      |  |      | LOC_Os04g56430 | cysteine-rich receptor-like protein kinase                      | +7.8  | +5.6  | +9.7  |
|     |                                                                |      |  |      | LOC_Os07g36544 | serine/threonine-protein kinase receptor                        | +2.4  | +2.6  | +3.9  |
|     |                                                                |      |  |      | LOC_Os06g48300 | protein phosphatase 2C                                          | +10.5 | +12.5 | +20.6 |
|     |                                                                |      |  |      | LOC_Os10g41980 | RALFL26 - Rapid Alkalinization Factor RALF family               | +9.5  | +5.9  | +8.4  |
|     |                                                                |      |  |      | LOC_Os06g29730 | RALFL28 - Rapid Alkalinization Factor RALF                      | +6.6  | +6.1  | +9.3  |
|     |                                                                |      |  |      | LOC_Os11g02240 | CAMK includes calcium/calmodulin dependent protein              | +5.7  | +4.2  | +7.3  |
|     |                                                                |      |  |      | LOC_Os01g24710 | jacalin-like lectin domain containing protein                   | +3.3  | +3.5  | +4.6  |
|     |                                                                |      |  |      | LOC_Os12g14440 |                                                                 | +97.0 | +86.7 | +94.7 |
|     |                                                                |      |  |      | LOC_Os12g09700 |                                                                 | +3.9  | +3.8  | +3.9  |
|     |                                                                |      |  |      | LOC_Os04g38360 | wound/stress protein                                            | +7.1  | +6.1  | +4.6  |
|     |                                                                |      |  |      | LOC_Os05g46480 | late embryogenesis abundant protein, group 3                    | +10.8 | +5.9  | +16.6 |



|                                                         |                                                              |      |      |      |
|---------------------------------------------------------|--------------------------------------------------------------|------|------|------|
| <b>Glyoxalase system</b>                                |                                                              |      |      |      |
| 96                                                      | Lactoylglutathione lyase (Glyoxalase I) gi 341870587         | -1.2 | -1.4 | -1.6 |
| <b>Phenylpropanoids metabolism and related proteins</b> |                                                              |      |      |      |
| 160                                                     | Phenylalanine/tyrosine ammonia-lyase gi 514715067            | -4.4 | -2.2 | -2.3 |
| 164                                                     | Phenylalanine ammonia-lyase gi 573919867 (Blast)             | -2.0 | -1.5 | -1.7 |
| 185                                                     |                                                              |      |      | -1.6 |
| <b>Terpene biosynthesis</b>                             |                                                              |      |      |      |
| <b>Antioxidation</b>                                    |                                                              |      |      |      |
| 3                                                       | Superoxide dismutase [Cu-Zn] gi 115473931                    | +2.0 | +1.6 | +1.8 |
| 247                                                     | Superoxide dismutase [Cu-Zn] gi 42408425                     | +1.9 |      | +1.4 |
| 5                                                       | Superoxide dismutase gi 538430                               | +1.7 |      |      |
| 213                                                     | Ascorbate_peroxidase gi 115458488                            | +1.5 |      |      |
| 205                                                     | L-ascorbate peroxidase 1 gi 158512874 (Blast)                | +1.8 | +1.4 | +1.4 |
| 208                                                     |                                                              | +1.6 | +1.2 | +1.3 |
| 16                                                      | IN2-1 protein (Glutathione S-transferase GSTZ5) gi 108707532 | -2.0 |      |      |
| 241                                                     | GSH-dependent dehydroascorbate reductase 1 gi 6939839        | +1.5 | +1.3 | +1.4 |
| 244                                                     | Peroxiredoxin-2F, mitochondrial-like gi 573912657            | +1.9 | +1.3 | +1.7 |

|                                                         |                                                      |       |       |       |
|---------------------------------------------------------|------------------------------------------------------|-------|-------|-------|
| LOC_Os03g47610                                          | thiamine biosynthesis protein thiC                   | +3.8  | +5.0  | +7.0  |
| LOC_Os11g37200                                          | transmembrane BAX inhibitor motif-containing protein | +3.2  | +2.3  | +3.0  |
| LOC_Os12g29400                                          | GRAM domain containing protein                       | +2.8  | +3.0  | +4.8  |
| LOC_Os09g08130                                          | indole-3-glycerol phosphate synthase                 | +3.0  | +3.3  | +4.0  |
| LOC_Os05g39250                                          | Putative cold regulated protein                      | +4.7  | +2.9  | +4.8  |
| LOC_Os03g48750                                          | Germin-like protein 3-3                              | +6.8  | +8.1  | +10.6 |
| LOC_Os03g48780                                          | Germin-like protein 3-6                              | +7.7  | +6.7  | +7.1  |
| LOC_Os06g19300                                          | cadmium tolerance factor                             | +2.7  | +3.2  | +2.4  |
| LOC_Os09g28160                                          | Putative phosphate transport protein                 | +2.4  | +3.1  | +4.2  |
| LOC_Os03g57640                                          | gibberellin receptor GID1L2                          | +5.6  | +6.8  | +8.9  |
| <b>Glyoxalase system</b>                                |                                                      |       |       |       |
| <b>Phenylpropanoids metabolism and related proteins</b> |                                                      |       |       |       |
| LOC_Os01g58100                                          | polyphenol oxidase                                   | +3.5  | +4.1  | +4.3  |
| LOC_Os10g18870                                          | dirigent                                             | -19.0 | -17.0 | -17.2 |
| LOC_Os10g18820                                          |                                                      | -3.4  | -3.5  | -3.3  |
| LOC_Os01g13610                                          | isoflavone reductase homolog IRL                     | +3.3  | +3.3  | +3.0  |
| LOC_Os10g40934                                          | flavonol synthase/flavanone 3-hydroxylase            | +2.4  | +2.8  | +3.7  |
| LOC_Os12g17160                                          | flavonol sulfotransferase                            | +2.7  | +2.1  | +3.0  |
| LOC_Os07g11440                                          | chalcone synthase                                    | +4.4  | +4.0  | +2.8  |
| LOC_Os09g17560                                          | Flavonoid 7-O-methyltransferase-like                 | +2.2  | +2.5  | +3.4  |
| <b>Terpene biosynthesis</b>                             |                                                      |       |       |       |
| LOC_Os04g01810                                          |                                                      | +2.4  | +1.7  | +3.4  |
| LOC_Os04g27430                                          |                                                      | +11.9 | +10.2 | +12.4 |
| LOC_Os04g27670                                          | terpene synthase                                     | +4.0  | +4.0  | +6.8  |
| LOC_Os08g07080                                          |                                                      | +4.3  | +3.5  | +3.3  |
| LOC_Os08g04500                                          |                                                      | -2.3  | -3.4  | -3.2  |
| LOC_Os04g10060                                          | ent-kaurene synthase                                 | +2.7  | +3.1  | +3.6  |
| LOC_Os06g47130                                          | Putative CLB1 protein                                | +3.3  | +3.0  | +4.3  |
| <b>Antioxidation</b>                                    |                                                      |       |       |       |
| LOC_Os02g53400                                          | thioredoxin                                          | +3.3  | +5.7  | +4.8  |
| LOC_Os01g22249                                          | Peroxidase precursor                                 | -3.2  | -1.9  | -3.1  |
| LOC_Os03g25300                                          |                                                      | -2.7  | -3.2  | -4.8  |
| LOC_Os06g35520                                          |                                                      | +2.2  | +3.2  | +2.1  |
| LOC_Os07g01410                                          |                                                      | -3.6  | -3.3  | -3.6  |
| LOC_Os07g01420                                          |                                                      | -2.5  | -2.7  | -3.4  |

| (Blast)                              |                                                                    |      |      |      |
|--------------------------------------|--------------------------------------------------------------------|------|------|------|
| <b>Cell structure and biogenesis</b> |                                                                    |      |      |      |
| 233                                  | 40S ribosomal protein S3-3-like gij573953785 (Blast)               | +2.1 | +1.3 | +1.7 |
| 229                                  | 40S ribosomal protein S5-like gij573961547 (Blast)                 |      |      | +1.6 |
| 230                                  | 40S ribosomal protein S7-like gij514816665                         | +2.8 | +2.0 | +2.4 |
| 226                                  | 60S acidic ribosomal protein P0-like gij573953644                  | +2.7 | +1.5 | +1.6 |
| 4                                    | Actin-depolymerizing factor 4 gij573926554 (Blast)                 | +2.0 |      | +1.3 |
| 206                                  | Ribosome-recycling factor, chloroplastic-like gij573952885 (Blast) | +1.3 | +1.3 | +1.5 |
| 147                                  | Cell division control protein 48-A gij15232776                     | -1.7 |      |      |
| 199                                  | Alpha tubulin-1D gij90289618                                       | -1.5 | -1.4 |      |
| 59                                   | Alanyl-tRNA synthetase, mitochondrial gij110288715                 | -1.7 |      |      |
| 134                                  | Elongation factor gij119395218                                     | -2.5 |      | -1.9 |
| 133                                  | Elongation factor gij119395216                                     | -3.0 |      | -1.7 |
| <b>Transport</b>                     |                                                                    |      |      |      |
| 102                                  | Mitochondrial outer membrane protein porin 1 gij573956673          | +2.2 |      |      |
| 232                                  | Porin-like protein gij115451401                                    | +3.6 | +1.7 | +2.1 |

| <b>Cell structure and biogenesis</b> |                                                           |      |       |       |
|--------------------------------------|-----------------------------------------------------------|------|-------|-------|
| LOC_Os11g32880                       | DEAD-box ATP-dependent RNA helicase                       | +4.9 | +4.2  | +6.6  |
| LOC_Os01g06310                       | glycine-rich cell wall structural protein                 | +4.6 | +3.2  | +4.2  |
| LOC_Os09g29710                       | beta-expansin                                             | +3.0 | +2.5  | +5.3  |
| LOC_Os03g60580                       | actin-depolymerizing factor                               | +9.3 | +10.2 | +15.4 |
| <b>Transport</b>                     |                                                           |      |       |       |
| LOC_Os01g43460                       | C4-dicarboxylate transporter/malic acid transport protein | +2.8 | +2.6  | +3.8  |
| LOC_Os01g36720                       | Probable high-affinity nitrate transporter 2.4            | -5.2 | -5.4  | -8.5  |
| LOC_Os02g02170                       | High-affinity nitrate transporter 2.1                     | -9.9 | -12.0 | -8.8  |
| LOC_Os02g38230                       | high affinity nitrate transporter                         | -5.8 | -7.0  | -6.1  |
| LOC_Os10g20470                       | MATE efflux family protein                                | +2.3 | +2.4  | +4.1  |
| LOC_Os04g30490                       | MATE efflux family protein                                | +2.7 | +3.2  | +2.5  |
| LOC_Os10g30770                       | inorganic phosphate transporter                           | +5.6 | +2.2  | +4.9  |
| LOC_Os04g10690                       | inorganic phosphate transporter                           | +4.4 | +2.7  | +5.6  |
| LOC_Os04g51830                       | OshKT1                                                    | -3.6 | -1.9  | -3.6  |
| LOC_Os06g48810                       | OshKT2 1 - Na+ transporter                                | -7.0 | -4.5  | -6.8  |
| LOC_Os10g21590                       | transporter family protein                                | +3.1 | +5.1  | +5.3  |
| LOC_Os04g13210                       | multidrug resistance-associated protein                   | +3.4 | +3.8  | +3.9  |
| LOC_Os02g03900                       | metal transporter Nramp6                                  | +3.8 | +3.3  | +2.7  |
| LOC_Os01g50100                       | ABC transporter, ATP-binding protein                      | +3.1 | +5.0  | +4.3  |
| LOC_Os08g29570                       | ABC transporter G family member 44                        | +2.4 | +2.1  | +3.4  |
| LOC_Os07g18874                       | ABC transporter family protein-like                       | -3.4 | -4.5  | -3.4  |
| LOC_Os07g33780                       | ABC transporter G family member 43                        | +2.4 | +2.3  | +3.0  |
| LOC_Os03g11900                       | transporter family protein                                | +2.3 | +2.4  | +3.4  |
| LOC_Os02g44080                       | aquaporin protein                                         | -3.1 | -3.9  | -4.6  |
| LOC_Os04g44060                       | aquaporin protein                                         | -2.7 | -3.1  | -2.8  |
| LOC_Os04g38680                       | transmembrane amino acid transporter protein              | +2.7 | +1.9  | +3.2  |
| LOC_Os01g50460                       | Bidirectional sugar transporter SWEET2b                   | -3.8 | -4.2  | -4.5  |
| LOC_Os12g33300                       | integral membrane protein DUF6 containing protein         | +4.8 | +5.8  | +5.6  |
| LOC_Os12g31860                       | ureide permease                                           | +4.6 | +4.8  | +5.0  |
| LOC_Os02g09810                       | Putative amino acid transporter A1                        | +3.7 | +3.9  | +7.2  |
| LOC_Os09g31478                       | auxin efflux carrier component                            | +3.7 | +4.7  | +5.2  |
| LOC_Os09g29660                       | white-brown complex homolog protein 11                    | +2.6 | +3.0  | +3.3  |
| LOC_Os06g03540                       | oligopeptide transporter                                  | -4.0 | -2.8  | -3.9  |

| Control of gene expression |                                                                                    |      |      |      |
|----------------------------|------------------------------------------------------------------------------------|------|------|------|
| 222                        | Methionine adenosyltransferase 2 gj 75308025                                       | +3.0 |      |      |
| 259                        | Eukaryotic translation initiation factor 3 subunit A gj 514781216 (Blast)          | +3.1 |      | +1.5 |
| 221                        | chloroplast stem-loop binding protein of 41 kDa b, chloroplastic-like gj 573963758 | -1.4 | -1.3 | -1.6 |
| RNA binding                |                                                                                    |      |      |      |
|                            |                                                                                    |      |      |      |
| Transcription factors      |                                                                                    |      |      |      |
|                            |                                                                                    |      |      |      |
| Unknown                    |                                                                                    |      |      |      |
| 254                        | Expressed protein gj 108707969                                                     | +1.6 |      |      |
| 82                         | NON-significant identification                                                     | -1.7 | -1.6 | -1.7 |
| 125                        | NON-significant identification                                                     | -2.1 |      | -1.8 |
| 135                        | NON-significant identification                                                     |      |      | -1.5 |
| 144                        | NON-significant identification                                                     | +1.7 |      |      |
| 145                        | NON-significant identification                                                     | -1.5 |      |      |
| 146                        | NON-significant identification                                                     | -1.8 |      |      |
| 150                        | NON-significant identification                                                     | -1.9 | -1.2 |      |
| 156                        | NON-significant identification                                                     | -1.8 |      | -1.6 |
| 157                        | NON-significant identification                                                     | -1.6 |      |      |
| 158                        | NON-significant identification                                                     | -2.5 |      | -1.9 |
| 162                        | NON-significant identification                                                     | -3.2 | -1.6 | -2.0 |
| 166                        | NON-significant identification                                                     | -2.0 |      |      |
| 172                        | NON-significant identification                                                     | -2.1 |      | -1.4 |
| 174                        | NON-significant identification                                                     | -2.8 |      | -1.6 |
| 175                        | NON-significant identification                                                     | -1.5 |      |      |

| LOC_Os06g07200             | syntxin                                                           | +2.4  | +3.0  | +2.5  |
|----------------------------|-------------------------------------------------------------------|-------|-------|-------|
| Control of gene expression |                                                                   |       |       |       |
| LOC_Os05g31020             | peptide chain release factor subunit 1                            | +3.8  | +3.1  | +4.3  |
| LOC_Os02g36590             | CPuORF19 - conserved peptide uORF                                 | -4.0  | -3.0  | -3.9  |
|                            |                                                                   |       |       |       |
| RNA binding                |                                                                   |       |       |       |
| LOC_Os02g33610             | Putative metallo beta subunit lactamase                           | +2.8  | +3.2  | +4.7  |
| LOC_Os09g36680             | Drought-induced S-like ribonuclease                               | +47.8 | +39.7 | +26.0 |
| LOC_Os09g36700             | Putative RNase S-like protein                                     | +16.5 | +17.7 | +11.8 |
| Transcription factors      |                                                                   |       |       |       |
| LOC_Os01g01840             | helix-loop-helix DNA-binding domain containing protein            | +7.1  | +5.1  | +6.3  |
| LOC_Os11g02540             | OsWRKY50 - Superfamily of TFs having WRKY and zinc finger domains | +6.9  | +8.3  | +8.1  |
| LOC_Os12g02450             | OsWRKY64 - Superfamily of TFs having WRKY and zinc finger domains | +5.6  | +5.8  | +6.0  |
| LOC_Os12g02470             | OsWRKY65 - Superfamily of TFs having WRKY and zinc finger domains | +7.0  | +7.5  | +6.0  |
| LOC_Os05g50340             | MYB family transcription factor                                   | -3.1  | -4.5  | -4.1  |
| LOC_Os06g45140             | bZIP family transcription factor                                  | -2.9  | -2.7  | -3.2  |
| LOC_Os05g45410             | Heat stress transcription factor A-4d                             | +2.0  | +1.8  | +3.1  |
| Unknown                    |                                                                   |       |       |       |
| LOC_Os05g49300             | Putative iron-sulfur cluster assembly complex protein             | +3.5  | +2.4  | +3.4  |
| LOC_Os01g06890             | leucine-rich repeat family protein                                | +4.7  | +2.1  | +4.9  |
| LOC_Os10g34930             | Putative basic secretory protein                                  | +3.0  | +2.7  | +3.1  |
| LOC_Os10g05820             | POEI5 - Pollen Ole e I allergen and extensin family protein       | +2.2  | +2.8  | +3.2  |
| LOC_Os11g45990             | von Willebrand factor type A domain containing protein            | +4.1  | +4.2  | +4.9  |
| LOC_Os11g46000             | von Willebrand factor type A domain containing protein            | +3.6  | +3.1  | +3.0  |
| LOC_Os06g38080             | von Willebrand factor type A domain containing protein            | +3.0  | +2.8  | +2.2  |
| LOC_Os04g51796             | DNA repair ATPase-related                                         | +2.8  | +2.3  | +3.2  |
| LOC_Os05g28770             | GCRP9 - Glycine and cysteine rich family protein                  | -2.3  | -2.1  | -3.3  |
| LOC_Os05g29710             | RING-H2 finger protein                                            | +2.5  | +3.2  | +3.5  |
| LOC_Os05g36310             | zinc finger, C3HC4 type domain containing protein                 | +2.9  | +2.6  | +3.1  |
| LOC_Os03g28990             | zinc finger family protein                                        | +2.4  | +4.2  | +2.9  |
| LOC_Os07g09420             | ATPase                                                            | +2.8  | +2.3  | +3.4  |
| LOC_Os07g48800             | VQ domain containing protein                                      | +3.9  | +3.4  | +3.5  |
| LOC_Os08g30020             | membrane protein                                                  | -3.9  | -3.5  | -3.7  |
| LOC_Os09g31380             | jmjC domain-containing protein 5                                  | +2.2  | +4.0  | +2.7  |

|     |                                   |      |      |      |
|-----|-----------------------------------|------|------|------|
| 176 | NON-significant identification    | +1.6 |      |      |
| 177 | NON-significant identification    | -1.7 |      | -1.2 |
| 187 | NON-significant identification    | -2.3 |      |      |
| 191 | NOT possible to pick from the gel | +1.6 | +1.4 |      |
| 192 | NOT possible to pick from the gel | +2.0 | +1.5 | +1.6 |
| 193 | NOT possible to pick from the gel | +1.6 |      |      |
| 197 | NON-significant identification    | +1.7 |      |      |
| 203 | NON-significant identification    | +1.7 | +1.4 | +1.4 |
| 212 | NON-significant identification    | +1.8 | +1.6 | +1.6 |
| 215 | NON-significant identification    | +1.4 |      | +1.6 |
| 216 | NON-significant identification    | +1.3 |      | +1.5 |
| 217 | NON-significant identification    | +2.6 | +1.7 | +1.7 |
| 225 | NOT possible to pick from the gel | +2.5 | +1.3 | +1.5 |
| 228 | NON-significant identification    | +2.8 |      | +2.0 |
| 234 | NOT possible to pick from the gel | +1.8 | +1.2 | +1.2 |
| 235 | NON-significant identification    | +1.7 |      |      |
| 238 | NON-significant identification    | +1.9 |      |      |
| 240 | NON-significant identification    | +1.6 |      |      |
| 242 | NON-significant identification    |      |      | +1.6 |
| 248 | NOT possible to pick from the gel | +1.6 |      | +1.5 |
| 251 | NOT possible to pick from the gel | +1.6 |      |      |
| 252 | NOT possible to pick from the gel | +1.8 |      |      |
| 253 | NOT possible to pick from the gel | +2.3 | +1.7 | +1.7 |
| 256 | NON-significant identification    | +1.5 | +1.3 | +1.4 |
| 258 | NOT possible to pick from the gel | +1.9 | +1.2 | +1.5 |
| 260 | NOT possible to pick from the gel | +2.9 |      | +2.0 |
| 261 | NON-significant identification    |      | -1.5 |      |

|                |                      |       |       |       |
|----------------|----------------------|-------|-------|-------|
| LOC_Os01g67320 | expressed protein    | -2.7  | -3.9  | -2.6  |
| Os01g0386500   | Os01g0386500 mRNA    | +20.0 | +13.9 | +21.8 |
| Os01g0661800   | Os01g0661800 mRNA    | +4.7  | +3.0  | +5.2  |
| Os10g0569600   | Os10g0569600 mRNA    | +4.5  | +4.1  | +3.5  |
| Os10g0450900   | Os10g0450900 mRNA    | +4.1  | +3.7  | +4.5  |
| Os01g0740700   | Os01g0740700 mRNA    | +2.4  | +2.3  | +3.4  |
| LOC_Os11g10590 | hypothetical protein | +12.0 | +10.7 | +10.0 |
| LOC_Os11g13750 | expressed protein    | -4.5  | -3.0  | -5.5  |
| LOC_Os01g71624 | expressed protein    | +11.6 | +10.1 | +18.5 |
| Os11g0303800   | Os11g0303800 mRNA    | +7.0  | +8.6  | +11.9 |
| Os12g0257600   | Os12g0257600 mRNA    | +10.4 | +8.5  | +12.7 |
| Os12g0431700   | Os12g0431700 mRNA    | +3.5  | +4.7  | +4.0  |
| Os12g0440300   | Os12g0440300 mRNA    | +3.4  | +2.0  | +3.1  |
| LOC_Os12g08700 | expressed protein    | +2.6  | +2.2  | +3.2  |
| LOC_Os12g11990 | expressed protein    | +2.5  | +3.5  | +2.5  |
| Os04g0650700   | Os04g0650700 mRNA    | -3.0  | -4.9  | -4.2  |
| LOC_Os05g49940 | expressed protein    | +2.3  | +2.1  | +3.1  |
| LOC_Os05g29160 | hypothetical protein | +2.5  | +2.6  | +3.8  |
| LOC_Os05g29680 | hypothetical protein | +3.9  | +4.8  | +3.7  |
| LOC_Os06g04480 | expressed protein    | +3.3  | +2.3  | +3.5  |
| LOC_Os06g28630 | expressed protein    | -5.2  | -4.0  | -6.7  |
| LOC_Os06g39120 | expressed protein    | +8.5  | +8.5  | +7.7  |
| LOC_Os06g05420 | expressed protein    | +3.6  | +4.7  | +5.6  |
| LOC_Os12g32610 | expressed protein    | +3.0  | +3.2  | +4.0  |
| Os06g0199100   | Os06g0199100 mRNA    | +3.0  | +2.7  | +6.1  |
| LOC_Os07g19540 | expressed protein    | +4.7  | +4.2  | +5.4  |
| Os07g0431000   | Os07g0431000 mRNA    | +6.8  | +11.7 | +8.4  |
| Os12g0222000   | Os12g0222000 mRNA    | +7.1  | +4.8  | +8.6  |
| Os07g0418600   | Os07g0418600 mRNA    | +3.9  | +5.6  | +5.5  |
| Os07g0457800   | Os07g0457800 mRNA    | +4.6  | +5.0  | +8.7  |
| Os07g0468200   | Os07g0468200 mRNA    | +3.1  | +3.0  | +4.4  |
| Os07g0678400   | Os07g0678400 mRNA    | -3.1  | -3.1  | -3.2  |
| LOC_Os08g32930 | expressed protein    | +3.3  | +4.2  | +5.1  |
| LOC_Os08g31860 | expressed protein    | +3.4  | +3.0  | +3.2  |
| LOC_Os09g02180 | expressed protein    | +3.5  | +2.5  | +4.4  |
| LOC_Os03g04080 | expressed protein    | +2.8  | +2.1  | +4.5  |

|                |                      |       |       |       |
|----------------|----------------------|-------|-------|-------|
| LOC_Os06g38660 | expressed protein    | +3.2  | +3.9  | +3.9  |
| LOC_Os09g23590 | expressed protein    | +3.3  | +2.4  | +4.6  |
| Os09g0513500   | Os09g0513500 mRNA    | +4.9  | +3.6  | +3.2  |
| Os01g0124400   | Os01g0124400 mRNA    | +4.6  | +3.2  | +5.9  |
| Os01g0695800   | Os01g0695800 mRNA    | +3.1  | +4.3  | +3.6  |
| Os01g0944900   | Os01g0944900 mRNA    | +4.8  | +3.3  | +4.6  |
| Os02g0155400   | Os02g0155400 mRNA    | +2.6  | +3.6  | +3.8  |
| Os07g0418700   | Os07g0418700 mRNA    | +5.8  | +9.3  | +7.9  |
| Os10g0515900   | Os10g0515900 mRNA    | +5.6  | +11.2 | +6.0  |
| Os12g0562000   | Os12g0562000 mRNA    | +4.8  | +3.9  | +6.5  |
| Os02g0494300   | Os02g0494300 mRNA    | +7.0  | +5.1  | +9.9  |
| Os03g0120600   | Os03g0120600 mRNA    | +9.8  | +11.1 | +12.1 |
| Os04g0600200   | Os04g0600200 mRNA    | +2.7  | +2.8  | +3.7  |
| LOC_Os10g23240 | hypothetical protein | +11.7 | +9.0  | +15.1 |
| LOC_Os12g11550 | hypothetical protein | +4.5  | +3.5  | +4.4  |
| LOC_Os12g11620 | hypothetical protein | +4.4  | +6.0  | +5.2  |
| LOC_Os12g17804 | hypothetical protein | +3.0  | +2.0  | +3.3  |
| LOC_Os07g43604 | hypothetical protein | +3.2  | +1.9  | +3.3  |

Differentially abundant spots with a fold change  $\geq 1.5$  at least in one of the tested circumstances were considered. Differentially expressed transcripts in the three situations and with a fold change  $\geq 3$  at least in one of the tested conditions were considered. Highlighted in **red** are the situations where similar identifications were found in proteomics and microarrays. **Green** means that the identification corresponds to a protein which is “non-allergen” as predicted by AlgPred software hybrid approach. **Orange** represents “allergen” proteins as predicted by AlgPred hybrid approach.
